# Animals transcribe at least half of the genome

Warren R. Francis<sup>1</sup> Gert Wörheide<sup>1,2,3</sup>

(1) Department of Earth and Environmental Sciences, Paleontology and Geobiology,  
Ludwig-Maximilians-Universität München, Richard-Wagner Straße 10, 80333 Munich, Germany  
(2) GeoBio-Center, Ludwig-Maximilians-Universität München, Munich, Germany  
(3) Bavarian State Collection for Paleontology and Geology, Munich, Germany  
Keywords: metazoa, comparative genomics, junk DNA, complexity, C-value

## Abstract

One central goal of genome biology is to understand how the usage of the genome differs between organisms. Our knowledge of genome composition, needed for downstream inferences, is critically dependent on gene annotations, yet problems associated with gene annotation and assembly errors are usually ignored in comparative genomics. Here we analyze the genomes of 68 species across all animal groups and some single-cell eukaryotes for general trends in genome usage and composition, taking into account problems of gene annotation. We show that, regardless of genome size, the ratio of introns to intergenic sequence is comparable across essentially all animals, with nearly all deviations dominated by increased intergenic sequence. Genomes of model organisms have ratios much closer to 1:1, suggesting that the majority of published genomes of non-model organisms are underannotated and consequently omit substantial numbers of genes, with likely negative impact on evolutionary interpretations. Finally, our results also indicate that most animals transcribe half or more of their genomes arguing against differences in genome usage between animal groups, and also suggesting that the transcribed portion is more dependent on genome size than previously thought.

## Author's Summary

Within our anthropocentric genomic framework, many analyses try to define humans, mammals, or vertebrates relative to the so-called "lower" animals. This implicitly posits that vertebrates are complex organisms with large genomes and invertebrates are simple organisms with small genomes. This has the problem that genome size is therefore presumed to correlate with complexity and ignores any unknown complexity of vast numbers of invertebrate groups, many with large genomes. Animals vary widely in genome size, by almost three orders of magnitude, but when sequencing new animal genomes preference is given to those with smaller genomes for reasons of cost. In trying to understand how genomes are used in general, there is an added layer of complication from quality of the assembly and annotation. We have examined genome usage across a wide range of animals and have described ways to account for errors of low-quality annotations. We also show that the genomes of invertebrates and vertebrates are not so different, and that when large-genome invertebrates are considered, the fraction of the genome that is genes appears to be strongly influenced by genome size.

## Introduction

Understanding why genomes vary greatly in size and how organisms make different use their genomes have been central questions in biology for decades [1]. For many bacteria, the majority of the genome is composed

40 of relatively short genes, averaging around 1000bp, and coding for proteins. Indeed, the largest bacterial  
41 genome (a myxobacterium) that has been sequenced is only 14 megabases, containing an estimated 11,500  
42 genes [2]. However, in eukaryotic organisms genomes can be over a thousand-fold larger than bacterial  
43 genomes, due to an increase in the number of genes (tens of thousands compared to a few thousand in most  
44 bacteria), expansion of the genes themselves due to the addition of introns, and expansion of the sequence  
45 between genes.

46  
47 As the number of genome projects has grown, massive amounts of data have become available to study  
48 how organisms organize and use their genomes. Genome projects vary substantially in quality of assembly  
49 and annotation [3, 4]. Unfortunately, the predicted genes are often taken for granted as being correct when  
50 these are only hypotheses of gene structure [5]. For example, one study found that almost half of the genes  
51 in the *Rhesus* monkey genome had a predictable annotation error when compared to the closest human  
52 homolog [6]. This has profound implications for all downstream analyses, such as studying evolution of  
53 orthologous proteins [7] and phylogeny based on protein matrices or gene content [8, 9]. When considered  
54 across all genes, systematic errors in genome assembly or annotation would severely skew bulk parameters  
55 of a genome.

56  
57 While issues of assembly are often thought to be technical problems that are resolved before continuing,  
58 all subsequent analyses are dependent upon accurate genome assembly and annotation. The absence of a  
59 protein family in a particular organism is only meaningful if it is certain that it is absent from the genome  
60 and not merely the annotation, therefore it is of utmost importance that all genes are properly represented.  
61 Yet for most genome projects of non-model organisms, there are limited methods to determine if the assem-  
62 bly and annotation are sufficient for downstream comparative analyses. Internal metrics can be used, such  
63 as the fraction of raw genomic reads or ESTs that map back to the assembly, though this does not tell us if a  
64 gene is believable in the context of other animals. Alternatively, counts of “universal” single-copy orthologs  
65 have been proposed as a metric of genome completeness [10, 11], though these genes only represent a small  
66 subset of all genes (few hundred out of tens of thousands in most animals).

67  
68 Identification of universal trends in genome organization and usage may enable better quantitative met-  
69 rics of genome completeness. Mechanistic models relating to evolution of gene content or coding fractions  
70 tended to focus on bacteria or archaea because of the relative ease of annotation. In regards to eukaryotes,  
71 some patterns in genome size have been discussed [12–14]. Additionally, a handful of studies have analyzed  
72 genome size in connection to other parameters such as indels [15], transposon content [16–19], average intron  
73 length [20, 21] or total intron length [18]. Despite these advances, none of these studies have estimated the  
74 amount of the genome that is genic, and none of them have described a way to account for technical problems  
75 in assembly and annotation.

76  
77 Here we examine basic trends of genome size and the relationship to annotation quality across animals and  
78 some single-celled eukaryotes. We show that assembly and annotation errors are widespread and predictable  
79 and that many genomes are likely to be missing many genes. We further show that re-annotation of select  
80 species with publicly available tools and transcriptome data improves the annotation. Future users may  
81 benefit if databases incorporate more recent data from transcriptome sequencing, and update annotation  
82 genome versions more frequently. Finally, we show that many animals appear to transcribe almost half of  
83 their genomes, suggesting this as a potential parameter to identify genome completeness across metazoans,  
84 and potentially other eukaryotes.

## 86 **Methods**

### 87 **Genomic data sources**

88 Data sources and parameters are available in Supplemental Table 1.

89

90 Genomic scaffolds and annotations for *Ciona intestinalis* [22], *Branchiostoma floridae* [23], *Trichoplax ad-*  
91 *herens* [24], *Capitella teleta* [25], *Lottia gigantea* [25], *Helobdella robusta* [25], *Saccoglossus kowalevskii* [26],  
92 *Monosiga brevicollis* [27], *Emiliana huxleyi* [28], and *Volvox carteri* [29] were downloaded from the JGI  
93 genome portal.

94  
95 Genome assemblies and annotations for *Sphaeroforma arctica*, *Capsaspora owczarzaki* [30] and *Salpin-*  
96 *goeca rosetta* [31] were downloaded from the Broad Institute.

97  
98 GFF annotations v2.1 [32] for *Amphimedon queenslandica* were downloaded from the Amphimedon  
99 Genome website (<http://amphimedon.qcloud.qcif.edu.au/downloads.html>), and v1 annotations [33] and as-  
100 semblies were downloaded from Ensembl.

101  
102 For *Nematostella vectensis*, Nemve1 assembly and annotations [34] were downloaded from JGI, and the  
103 transcriptome for comparative reannotation was downloaded from <http://www.cnidariangenomes.org/> [35].

104  
105 Genome assembly, transcriptome assemblies from Cufflinks and Trinity, and GFF annotations for *Mne-*  
106 *miopsis leidy* [8] were downloaded from the Mnemiopsis Genome Portal (<http://research.nhgri.nih.gov/mnemiopsis/>).  
107 Assembly and annotations for *Sycon ciliatum* [36] were downloaded from COMPAGEN. Assembly and  
108 annotation for *Botryllus schlosseri* [37] were downloaded from the Botryllus Schlosseri genome project  
109 (<http://botryllus.stanford.edu/botryllusgenome/>). Assembly and annotation for *Aiptasia sp.* [38] were down-  
110 loaded from <http://reefgenomics.org>. Assembly and annotation for *Oikopleura dioica* [39] were downloaded  
111 from Genoscope (<http://www.genoscope.cns.fr/externe/GenomeBrowser/Oikopleura/>). Assembly and anno-  
112 tation for *Tetrahymena thermophila* were downloaded from the Tetrahymena Genome Database ([ciliate.org](http://ciliate.org)).  
113 Assembly and annotation for *Symbiodinium kawagutii* [40] were downloaded from the Dinoflagellate Re-  
114 sources page ([web.malab.cn/symka\\_new/index.jsp](http://web.malab.cn/symka_new/index.jsp)).

115  
116 Assemblies and annotations for *Symbiodinium minutum* [41], *Pinctada fucata* [42], *Acropora digitifera*  
117 [43], *Lingula anatina* [44], *Ptychodera flava* [26], and *Octopus bimaculoides* [45] were downloaded from the  
118 OIST Marine Genomics Browser (<http://marinegenomics.oist.jp/gallery/>).

119  
120 Builds of *Homo sapiens*, *Pan troglodytes*, *Mus musculus*, *Canis lupus* [46], *Monodelphis domestica* [47],  
121 *Ornithorhynchus anatinus* [48], *Xenopus tropicalis* [49], *Struthio camelus* [50], *Gallus gallus*, *Taeniopygia*  
122 *guttata* [51], *Aptenodytes forsteri* [50], *Anas platyrhynchos* [52], *Melopsittacus undulatus* [53], *Alligator mis-*  
123 *sissippiensis* [54], *Anolis carolinensis* [55], *Chrysemys picta bellii* [56], *Chelonia mydas* [57], *Pelodiscus*  
124 *sinensis* [57], *Python bivittatus* [58], *Salmo salar*, *Danio rerio* [59], *Latimeria chalumnae* [60], *Petromy-*  
125 *zon marinus* [61], *Callorhynchus milii* [62], *Crassostrea gigas* [63], *Dendroctonus ponderosae* [64], *Tribolium*  
126 *castaneum* [65], *Bombyx mori* [66], *Limulus polyphemus* [67] were downloaded from the NCBI Genome server.

127  
128 Genome assemblies and annotations of *Caenorhabditis elegans* [68], *Drosophila melanogaster*, *Strongy-*  
129 *locentrotus purpuratus* [69], *Daphnia pulex* [70], *Apis mellifera* [71], *Ixodes scapularis* [72], *Strigamia mar-*  
130 *itima* [73] were downloaded from Ensembl.

## 132 Calculation of exonic and genic sequence

133 For all analyses, we used the total number of bases in the assembly as the total genome size, bearing in  
134 mind that this may result in a systematic underestimation of total genome size as repeated regions may be  
135 omitted from assemblies. For example, the horseshoe crab *L. polyphemus* has a scaffold assembly of 1.8Gb  
136 while the reported genome size is 2.7Gb [67], a difference of almost a gigabase.

137  
138 If GFF format files were available for download with a genome project, or on databases (Ensembl or  
139 NCBI), those were used preferentially. Total bases of exon, intron, intergenic, and gaps were counted from  
140 each GFF file and genomic contigs (or scaffolds) with a custom Python script ([gtfstats.py](http://bitbucket.org/wrf/sequences), available at [bit-](http://bitbucket.org/wrf/sequences)  
141 [bucket.org/wrf/sequences](http://bitbucket.org/wrf/sequences)). The script converts all gene and exon annotations to intervals and ignores the

142 strand. All overlapping exon intervals are merged, meaning that alternative splice sites, or exons on the  
143 opposite strand, are treated as a single interval. The same is done for genes or transcripts, whichever is  
144 available, and introns are calculated as the difference of the two sets. This means that any sequence that  
145 is an exon on one strand and an intron on the other is treated for all purposes as an exon, meaning those  
146 bases or their reverse complement are transcribed and retained in some case. Intergenic sequence is defined  
147 as the difference between total sequence bases and genic bases, and gaps are defined as any repeats of 'N's  
148 longer than one base.

149  
150 If exons are not specified, then coding sequences (CDS) are used instead if they are available, such as  
151 for AUGUSTUS predictions. Additional features such as “microRNA”, “tRNA”, “ncRNA” are included for  
152 gene and exon calculations if they were in the standard GFF3 format. Some annotations had to determine  
153 the gene ID from the exons. For example, most of the older GTF files from the earlier JGI genomes had only  
154 exons annotated, without individual features for genes or mRNAs, so the gene was then defined as all of the  
155 exons with the same feature ID. Exons defined as part of a “pseudogene”, or genes defined as pseudogenes,  
156 were also excluded from all counts.

## 158 Calculation of average exon and intron length

159 The same script (`gtfstats.py`, available at [bitbucket.org/wrf/sequences](http://bitbucket.org/wrf/sequences)) also calculated the average exon and  
160 intron length. All possible exons were taken into account for determination of averages. Identical exons of  
161 splice variants were treated as one exon and counted once, however, alternative boundaries were treated as  
162 a separate exons. Introns were calculated as the space between exons. To account for splice variants, the  
163 maximum amount of exon is used, meaning that the most exons and largest exons are used in all cases;  
164 retained introns are treated as exons, not introns.

## 166 Reannotation of select species

167 Due to unexpectedly high or low gene content, six genomes were selected for reannotation.

168  
169 The original Triad1 scaffolds of *T. adherens* [24] were reannotated with AUGUSTUS v3.0.3 [74] with  
170 the following options: `-strand=both -genemodel=atleastone -sample=100 -keep_viterbi=true -alternatives-`  
171 `from-sampling=true -minexonintronprob=0.2 -minmeanexonintronprob=0.5 -maxtracks=2`. Species train-  
172 ing was generated using the Triad1 ESTs with the webAugustus Training server [75].

173  
174 The original Monbr1 scaffolds of *M. brevicollis* [27] were reannotated with AUGUSTUS as for *T. adherens*,  
175 using the same parameters except trained using the Monbr1 ESTs with the webAugustus Training server [75].

176  
177 For the hydrozoan *H. magnipapillata*, the original assembly was downloaded from JGI [76] and a new scaf-  
178 fold assembly was downloaded from the FTP of Rob Steele at UC Irvine (at <https://webfiles.uci.edu/resteele/public>).  
179 For both cases, the scaffolds were reannotated using TopHat2 v2.0.13 [77] and StringTie v1.0.4 [78] with  
180 default options by mapping the reads from two paired-end RNAseq libraries, NCBI Short Read Archive  
181 accessions SRR922615 and SRR1024340, derived from whole adult animals.

182  
183 For the lancelet *B. floridae*, the Brafl1 scaffolds [23] were reannotated using TopHat2 v2.0.13 [77] and  
184 StringTie v1.0.4 [78] with default options by mapping the reads from the paired-end RNAseq library, NCBI  
185 SRA accession SRR923751, from the adult body.

186  
187 For the lamprey *P. marinus*, we were unable to find any annotation as GFF or GTF, so we generated  
188 one using TopHat2 v2.0.13 [77] and StringTie v1.0.4 [78] based on the Pmarinus-v7 scaffolds from NCBI and  
189 the 16 single-end Illumina libraries from NCBI BioProject PRJNA50489.

190  
191 For the octopus *O. bimaculoides*, scaffolds were downloaded from the OIST Marine Genomics plat-  
192 form [45], and were reannotated using TopHat2 v2.0.13 [77] and StringTie v1.0.4 [78] with default options

193 by mapping 19 paired-end RNAseq libraries from NCBI BioProject PRJNA285380.

194

195 All reannotations are available for download as GTF or GFF files (see <https://bitbucket.org/wrf/genome-reannotations/downloads>).

197

## 198 Results

### 199 Overview and organization of data

200 A total of 68 genomes were analyzed, with 59 selected across all major metazoan groups and nine genomes  
201 of single-celled eukaryotes. For each group, only select species were taken to avoid having a single group  
202 dominate the analysis. For example, over 100 mammalian genomes are available though only six were used  
203 including three model organisms (human, mouse, dog), opossum and platypus (for the non-eutherian clades,  
204 marsupial and monotreme, respectively) and the chimp, to compare directly to the human annotation. In  
205 general, parasites were excluded because they often have unusual biology, such as the single-celled eukaryote  
206 *T. brucei*, which is known for its unusual RNA processing [79,80].

207

208 The smallest animal genome used in this study is that of the larvacean *Oikopleura dioica* (70Mb), while  
209 the largest is that of the opossum *Monodelphis domestica* (3598Mb). It should be noted that some of the pub-  
210 lic genome sequencing projects selected the animal of their clade based on their known small genomes. Two  
211 examples of this are the shark *C. milii* and the pufferfish *T. rubripes*. Yet it must be considered that in terms  
212 of genomes, they may not be representative of their clades; many other shark genomes are estimated to be  
213 over 10Gb (haploid genome size) [81], such that a shark genome of only 1Gb may not be “normal” for sharks.

214

215 Additionally, not all of the species in the sample were sequenced or annotated with the same method,  
216 making direct comparison more challenging. For instance, some of the earlier genomes (such as *Branchios-  
217 toma floridae* and *Trichoplax adherens*) were annotated only with Sanger ESTs (order of tens of Mb), which  
218 were used to train gene prediction algorithms. Because not all genes have features easily captured by the  
219 EST training, several different results are expected: some genes are split because internal exons are not  
220 properly found or may have misassemblies in the draft genomes; adjacent genes on the same strand are  
221 fused; or genes are omitted entirely.

222

### 223 Connection between annotation and understanding of genomes

224 Genome projects generally seek to annotate protein coding regions of a genome. Broadly, there are two  
225 methods of doing this, comparison to other proteins from other genomes and by aligning mRNA from ESTs  
226 or RNAseq [3]. In practice, improvements in methods have made it relatively easy to directly predict proteins  
227 from the genome sequence. However, untranslated regions (UTRs) are difficult to predict and often require  
228 evidence from ESTs or transcriptome sequencing for accurate predictions, and this has implications for our  
229 measurements of total exons in each genome. This means that even in a “perfect” genome where all coding  
230 genes are correctly predicted by an annotation program (perhaps based on similarity to a related species)  
231 that the precise positions and amount of UTR may still be unknown, resulting in an underestimation of  
232 the amount of exonic sequence (Fig 1A and B). Because of this, the reliance on coding genes is likely to  
233 underestimate the usable fraction of the genome.

234

235 To illustrate this, one may consider a hypothetical eukaryotic genome of 60Mb with 10,000 genes and  
236 equal fractions of exons, introns, and intergenic sequence, at 20Mb each. For simplicity, all exons are the  
237 same size (in this example, 200bp), so an average gene (with ten-exons) may contain one exon for the 5'-  
238 UTR, and one for the 3'- UTR, and the remaining eight exons are coding. Based on the above annotation  
239 scheme, 20% of the exonic fraction (those containing the 5' and 3'-UTRs) is missing in the final annotation.  
240 Two introns per gene are also missing (the first and last introns), about 18% of the intronic fraction. This  
241 would yield a final annotation where exons are predicted as 16Mb (26.6% of the genome) and introns as

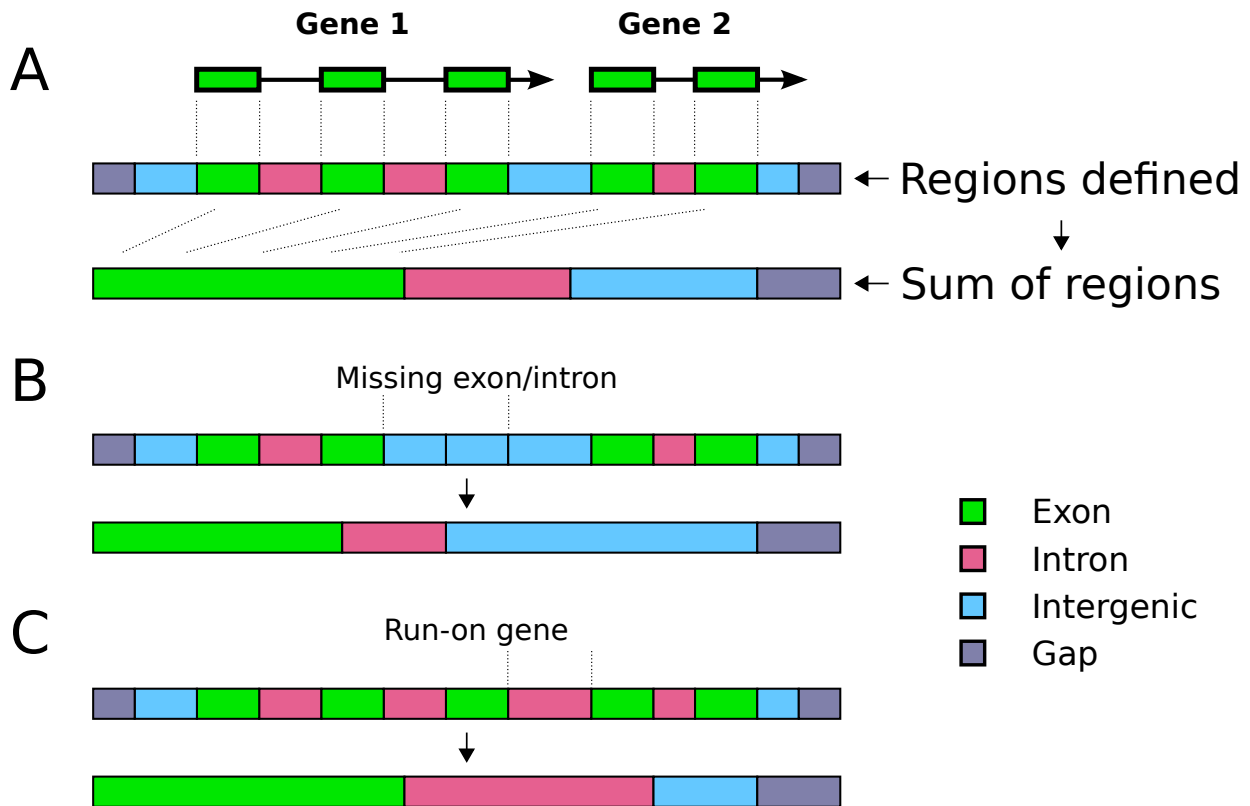

Figure 1: **Schematic of misannotations and the effects on coding fraction analyses** (A) In a normal case, two hypothetical genes on the same strand are identified. The exons and introns are defined, and the total lengths of those features are summed and displayed in the bars below. Because real genome assemblies can often contain gaps, sample gaps are also shown at the edges of the segment. (B) If individual exons (or potentially whole genes) were missing, then the measured total exons and introns would be smaller than the real values, and the ratio of intron:intergenic would decrease. (C) If neighboring genes were erroneously declared to be contiguous, the exonic fraction is mostly unchanged but the intron:intergenic ratio would increase.

242 15.5Mb (25.9% of the genome). This would also indicate that 52.6% of the genome is genes, a substantial  
 243 underestimation from the actual value of 66.6%.

244

245 However, other systematic errors can result in an overestimation of the genic fraction. If we consider mul-  
 246 tiple genes on the same strand, in a head-to-tail arrangement, and recall that UTRs are often not predicted,  
 247 then an exon containing the stop codon with a 3'-UTR may be omitted and the predicted gene may continue  
 248 into the next gene (Fig 1C). If it is assumed that the majority of coding exons are correctly predicted, then  
 249 if such predictions were made systematically one may expect that the measured amount of exons does not  
 250 deviate much from the true exonic fraction. However, because introns are defined as the removed sequence  
 251 between exons of the same gene, then the sequence between the two genes that should have been defined as  
 252 intergenic will instead be defined as intronic, thus raising the intron:intergenic ratio above 1.

253

254 The above problems assume that the genomic assembly is nonetheless correct, yet the annotation is  
 255 directly affected by assembly problems as well. Of the two main sources of problems, repeats [82] and het-  
 256 erozygosity [26, 42, 63, 83], repeats often result in breaks in the assembly that could split genes (Fig 2A).  
 257 Genes that are split at contig boundaries are likely to have exons missing (or on other scaffolds) and thus



258 the sequence that should be defined as introns would be instead defined as intergenic (Fig 2B).

259

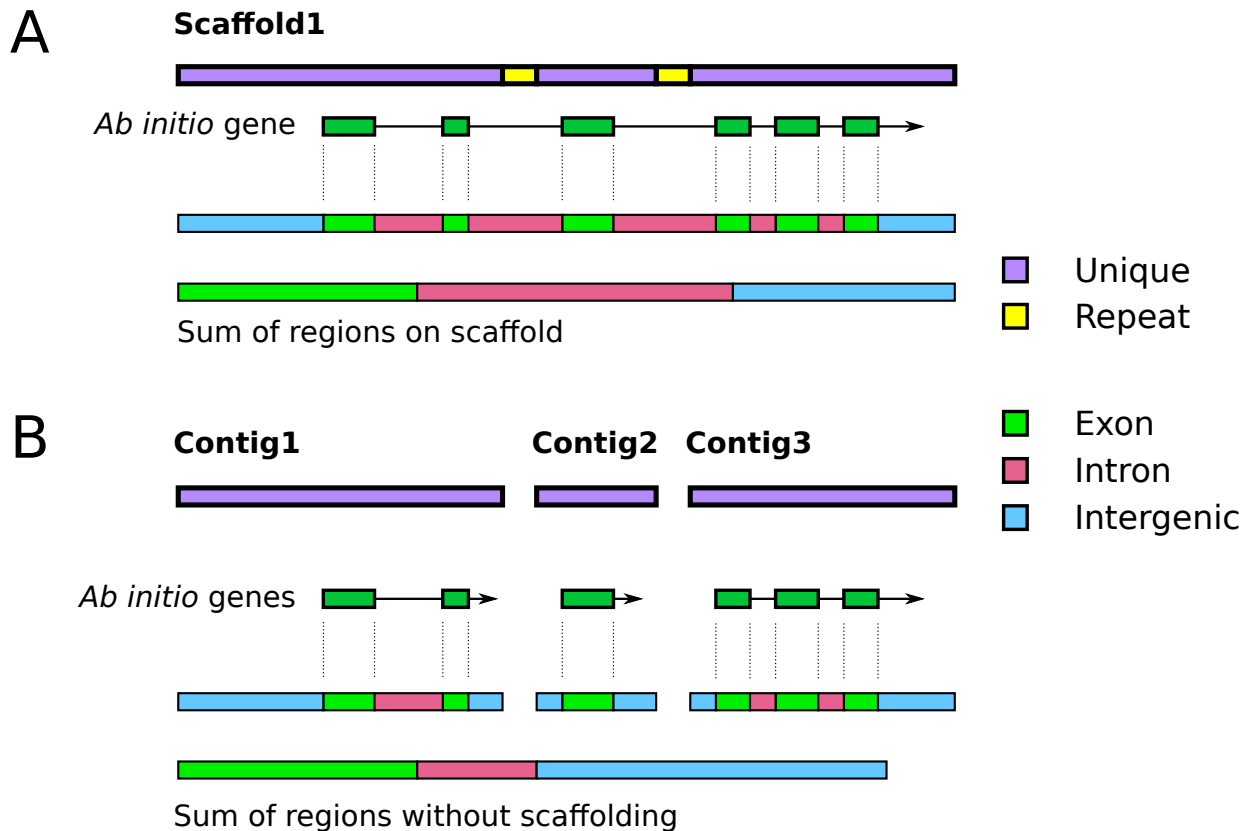

Figure 2: **Schematic of the effects of scaffolding and repeats on genic fraction analyses** (A) For a hypothetical scaffold in a genome assembly, two identical repeats are found within introns. The gene is correctly predicted to span the two repeats and the regions are defined below as in Fig 1. (B) For the case without scaffolding, or where the assembler breaks the assembly at repeats (or other high coverage regions), three contigs are generated. Note that the numbers are arbitrary, and in a real assembly they are unlikely to be in order. When annotated, all of the exons are correctly found, but the connections between them are missing for the single exon on Contig 2, resulting in a loss of intronic sequence. The final measured amount of exons is comparable, but the intron:intergenic ratio would decrease.

260 For normal diploid genomes (wild strains, not inbred lab strains), heterozygosity is not uniform across  
 261 the genome. Some regions are identical between the two haplotypes (hence are homozygous alleles or loci),  
 262 while others may vary by SNPs, short indels, or copy numbers of repeats, exons, or even genes. For sequences  
 263 that are identical between both haplotypes, the contigs are generally kept as is, while a more complex deci-  
 264 sion must be made for the heterozygous loci. During normal genome assembly, the assembler evaluates the  
 265 coverage at each “bubble” (where the de Bruijn graph has two paths out of a node, and both paths merge  
 266 again at the next node) and ultimately has to retain one of the paths at the exclusion of the other (Fig 3A)  
 267 (also see schematics in [83] and [84]). This merging is the essential process that creates the reference genome,  
 268 even though that reference is an arbitrary merge of the two haplotypes. Therefore, it must be kept in mind  
 269 that predicted genes or proteins in reference genomes may not be identical to either haplotype.

270

271 Regions with relatively high heterozygosity may fail to be merged in this way, leaving contigs of both  
 272 haplotypes in the assembly (Fig 3C). During subsequent scaffolding steps, contigs of separate haplotypes

273 can be fused head-to-tail if mate pairs are bridging the unique regions. Because this head-to-tail joining is  
274 an artifact, no reads should map at the junction point, resulting in a region of zero coverage at the junction  
275 and flanked by regions where coverage is half of the expected value (Fig 3D). One additional feature may  
276 reveal this artifact: exons in the unmerged sections may be individually annotated but mapped ESTs or  
277 *de novo* assembled transcripts may show a staggered exon pattern (Fig 3E) because transcripts can only  
278 map to one of the two possible exons (2a or 2b, 3a or 3b). This may increase the ratio of intron:intergenic  
279 sequence (Fig 3F), but also falsely indicate that splice variation is more prevalent for this gene.

280



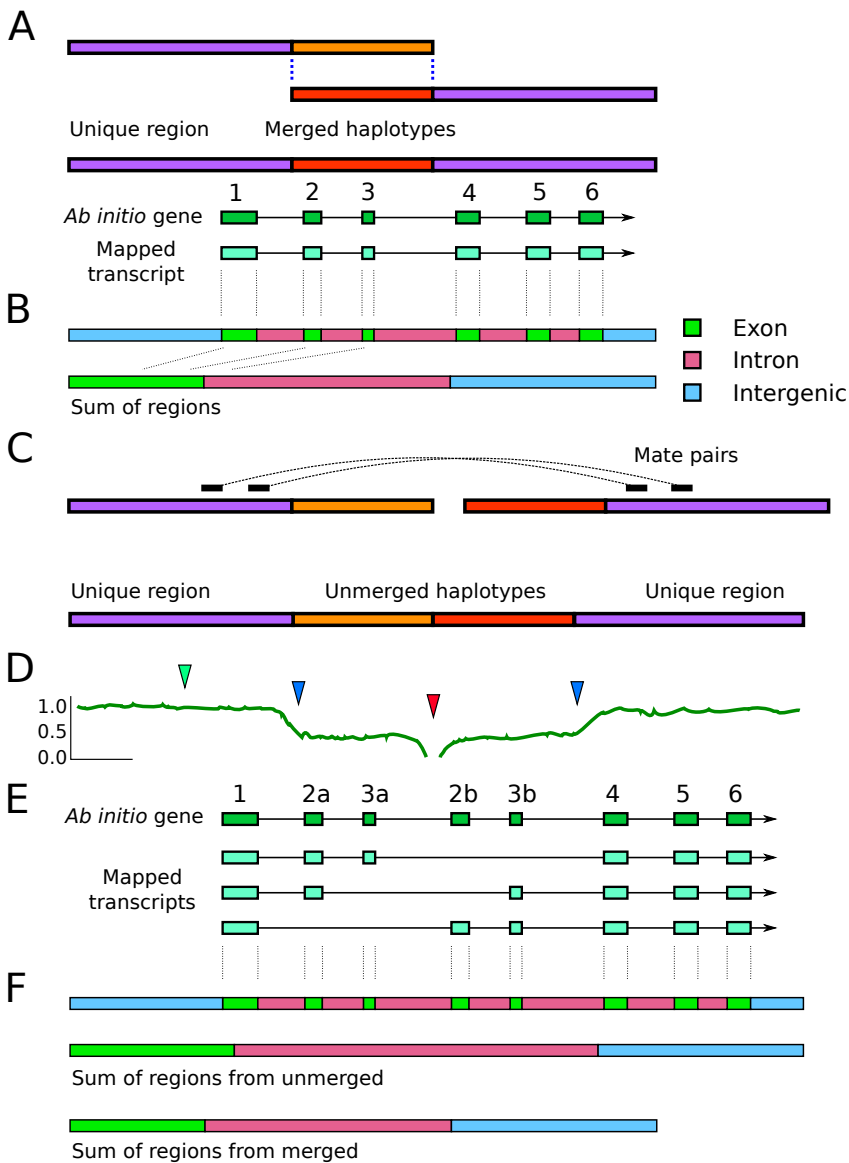

**Figure 3: Schematic of misassembly and the effects on genic fraction analyses** (A) During assembly, regions that are heterozygous (differing by SNPs or indels) are combined to make a single reference contig. When genes are predicting that this locus, or when assembled transcripts are aligned to the genome, the correct exon structure is found. (B) Regions are defined as exon, intron, or intergenic, as in Fig 1. (C) Reference genomes are a mix of the maternal and paternal haplotypes, but not uniformly. Rather than being merged into a single sequence, highly heterozygous regions may be assembled as different contigs that get erroneously fused during scaffolding steps. Mate pairs that bridge the two purple unique regions will instead result in a head-to-tail joining of the two unmerged haplotype sequences. (D) Hypothetical plot of read coverage across the contig. The green arrow shows a region of normal coverage (1x) while the blue arrows show sites where coverage is reduced because reads for each haplotype map separately. At the fusion point between the two haplotypes (red arrow), no reads will map since the sequence is an artifact, or is represented by a gap. (E) Mapped transcripts (or ESTs) or transcripts derived from mapped RNAseq reads (such as by Cufflinks or StringTie) may only be mapped to one of the two haplotypes, thereby producing a staggered exon structure. A mapped transcript can only align to either exon 2a or 2b, but not both, likewise for 3a or 3b, yet all other exons are unique and would align correctly. Genes predicted *ab initio* may annotate both sets of exons (2a/3a and 2b/3b), which may result in a duplication in some part of the protein, or a premature stop codon if 3a and 2b are out of phase. (F) For this hypothetical case, the sum of the regions would appear to have increased total exon size and the total intron size compared to the same genomic locus where the haplotypes were correctly merged.

## 281 Reannotation and changes following RNAseq reannotation

282 Keeping in mind the above error sources, some of the genomes used in our study had obvious problems of  
 283 too much or too little genic content that would confound our analyses. For instance, the total amount of  
 284 exons in the JGI annotation of *T. adherens* (Triad1) was only 14Mb, over twofold lower than the related  
 285 species, the placozoan strain H13 (REF?), and thus it was expected to contain many more or longer genes  
 286 than were present in the original Triad1 annotation. Because of this, we remade a gene annotation for  
 287 five of the species (see Methods) and used two additional publicly available annotations for *N. vectensis*  
 288 and *A. queenslandica*. For most species, the reannotation dramatically increased the total amount of exons  
 289 as well as the total bases of genes (Fig 4). The only exception was *B. floridae*, where the original anno-  
 290 tation had predicted 90% of the genome as genes, while the reannotation had annotated only 44.8% as genes.  
 291

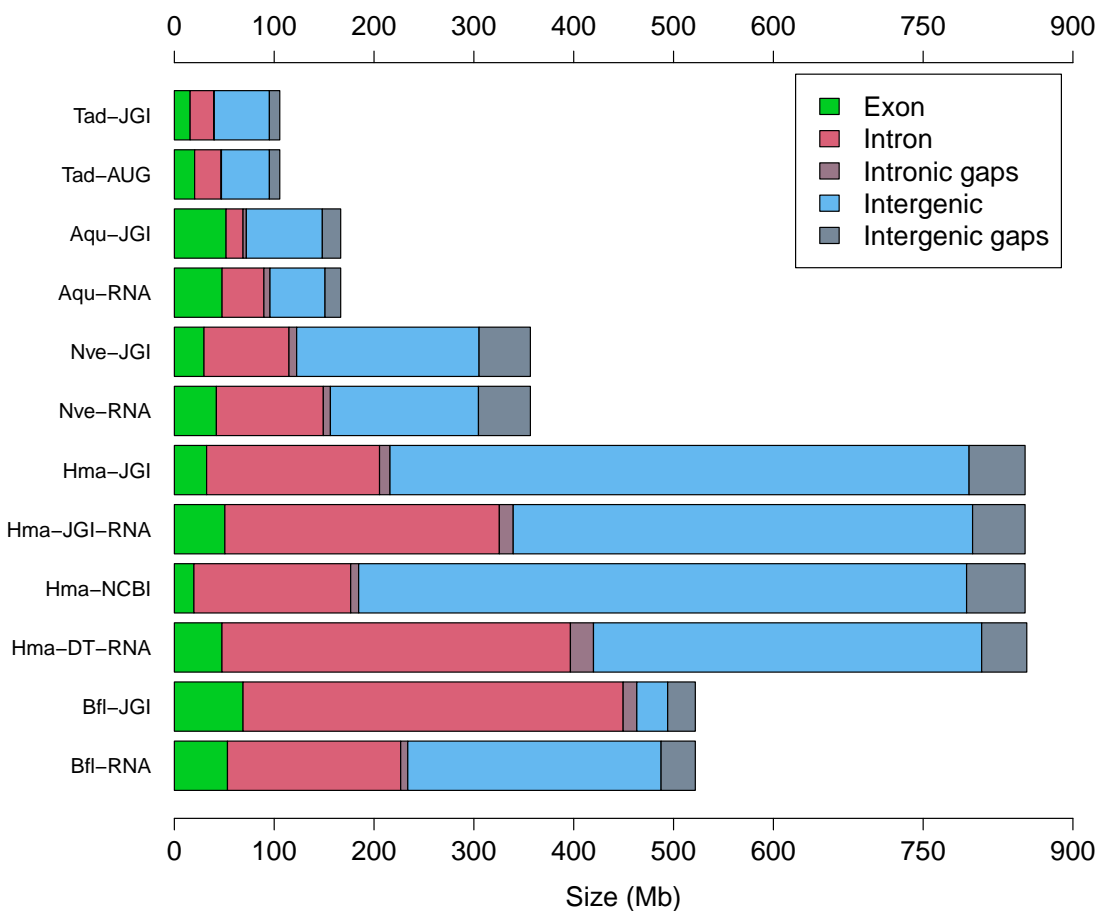

Figure 4: **Proportions of exons, introns, and intergenic sequences** Barplot showing the summed proportions of genomes composed of exons (green), introns (red) and intergenic sequences (blue). The reannotation for *O. bimaculoides* was not shown for clarity, as this genome is substantially larger than the others. Abbreviations are as follows: Tad:*T. adherens*, Aqu:*A. queenslandica*, Nve:*N. vectensis*, Hma:*H. magnipapillata*, Bfl:*B. floridae*. JGI refers to the original annotations for each species downloaded from the JGI Genome Portal. RNA refers to reannotation (see Methods) with RNAseq. Hma-NCBI is the NCBI GNOMON annotation of *H. magnipapillata*. Hma-DT-RNA is the Dovetail reassembly of *H. magnipapillata* annotated with RNAseq. AUG is the reannotation using AUGUSTUS for *T. adherens*.

292 We then compared the ratio of intron:intergenic sequence across seven of the reannotated species (Fig 5).  
 293 Across these species, reannotation significantly shifted the ratio of intron:intergenic sequence, approaching a  
 294 1:1 ratio (difference from 1:1 ratio, paired two-end t-test, p-value: 0.014). For *M. brevicollis*, the genome is

295 very small and the majority is exons, so the reannotation was likely to change gene boundaries (separating  
 296 run-on genes) rather than defining many new genes; our reannotation contains 10,864 genes compared to  
 297 the 9,196 genes in Monbr1 “best models”.

298

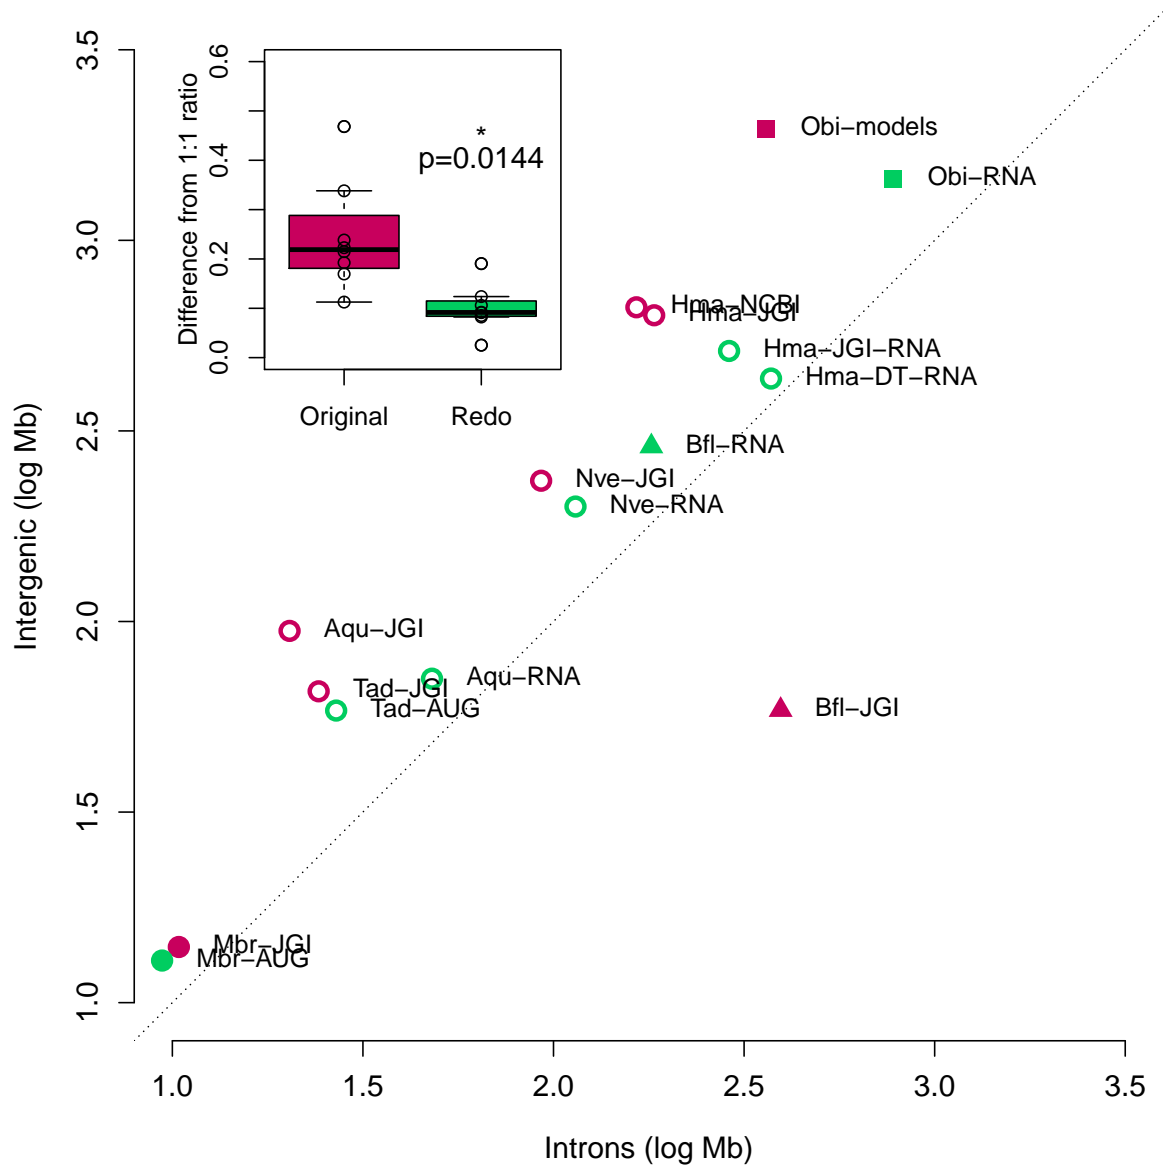

Figure 5: **Improvements from reannotation** Log-scale plot of total intronic size versus total intergenic size where original annotations from the published genomes are shown in red and reannotations are shown in green. The dotted line shows a ratio of 1:1 as a reference. Abbreviations are as in Fig 4, with the addition of Mbr: *M. brevicollis* from the original JGI annotation and the redo with AUGUSTUS, and Obi: *O. bimaculoides* from the published gene models and the reannotation with Tophat/StringTie. The inset graph shows box plot of difference of the intron:intergenic ratio to 1, showing the reannotated genomes (green) are significantly closer than the original version (paired two-end t-test, p-value: 0.0144).

299 **Basic trends related to genome size**

300 We observed linear correlations of total genome size to both total intronic size and intergenic size (Fig 6)  
301 (p-value:  $< 10^{-37}$  for both parameters). A much weaker correlation is observed for exons ( $R$ -squared:0.3856,  
302 p-value:  $10^{-8}$ ). Because the the total amount of exons in the largest genomes can be several times greater  
303 than the total size of the smallest genomes used in the study, a correlation is likely to be observed. Thus,  
304 the total amount of exons is necessarily affected by total genome size, even if this is not strongly correlated.

305

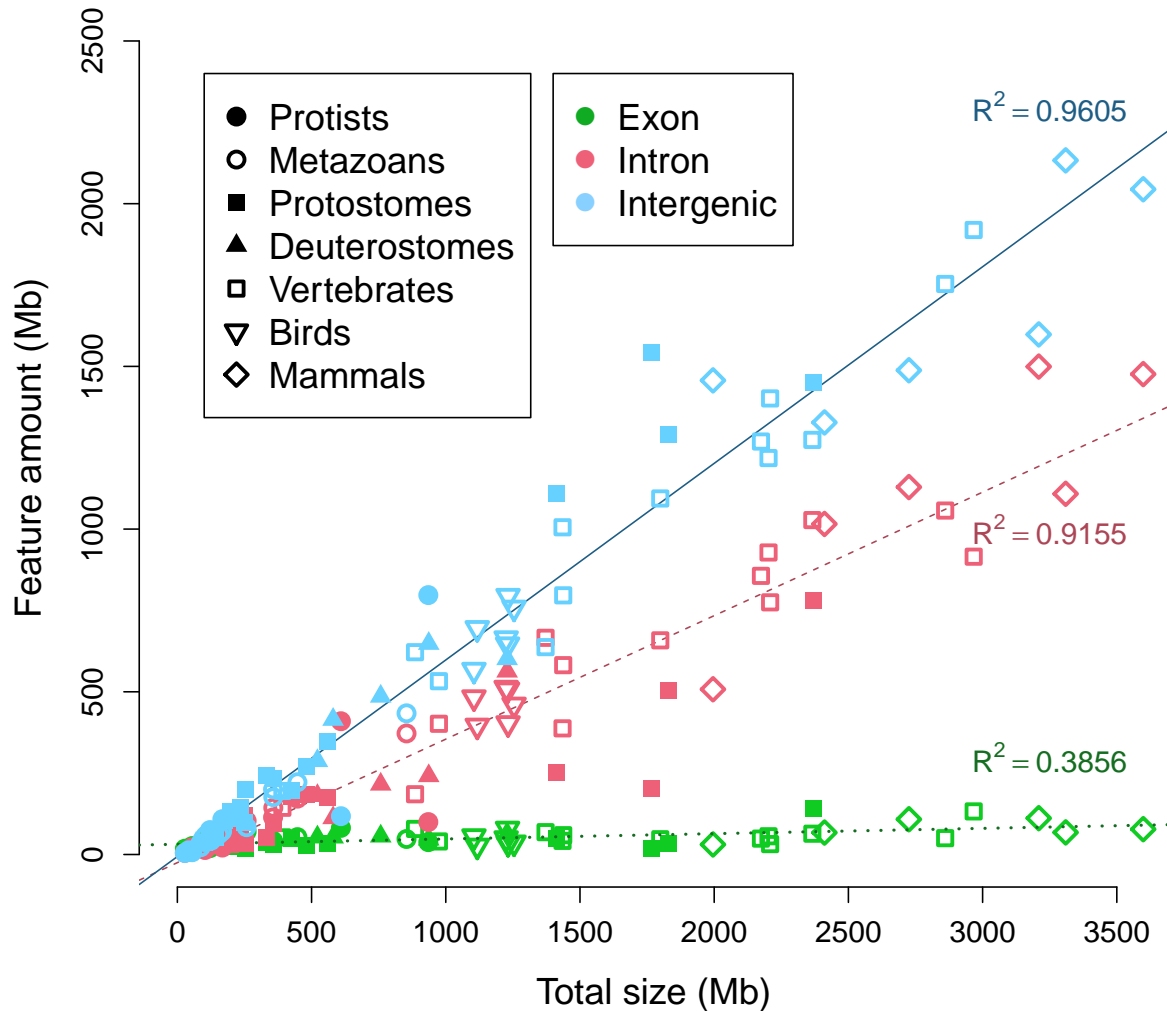

Figure 6: **Comparison of features to total genome size** The sums of exons, introns, and intergenic regions are plotted against total genome size. Linear correlation coefficients of the three features are displayed by their respective lines. For legend symbols, Deuterostomes refers to all invertebrate deuterostomes, Vertebrates excludes Reptiles, Birds and Mammals.

306 **Average intron and exon length**

307 The average length of introns linearly scales with the total genome size (Fig 7), in agreement with another  
308 study [18]. However, the average exon length is clearly constrained across animals relative to total genome  
309 size, and this may be related to interactions with nucleosomes [85]. Most species have an average exon

310 length between 200 and 300 bases (mean of 263bp), higher than values reported from previous surveys of  
311 exon length [21, 86]. It must be stated that the average values presented here should not be taken as final,  
312 because variations in format of the annotations and quality of the genomes will affect the values. Since many  
313 genomes are only annotated with *ab initio* gene predictions, UTR exons may be missing from the annotation  
314 and all downstream calculations. Given that the first exon and intron tend to be longer than other exons  
315 and introns [21], respectively, absence of five-prime UTRs may result in an underestimation of the average  
316 exon length for that species.

317

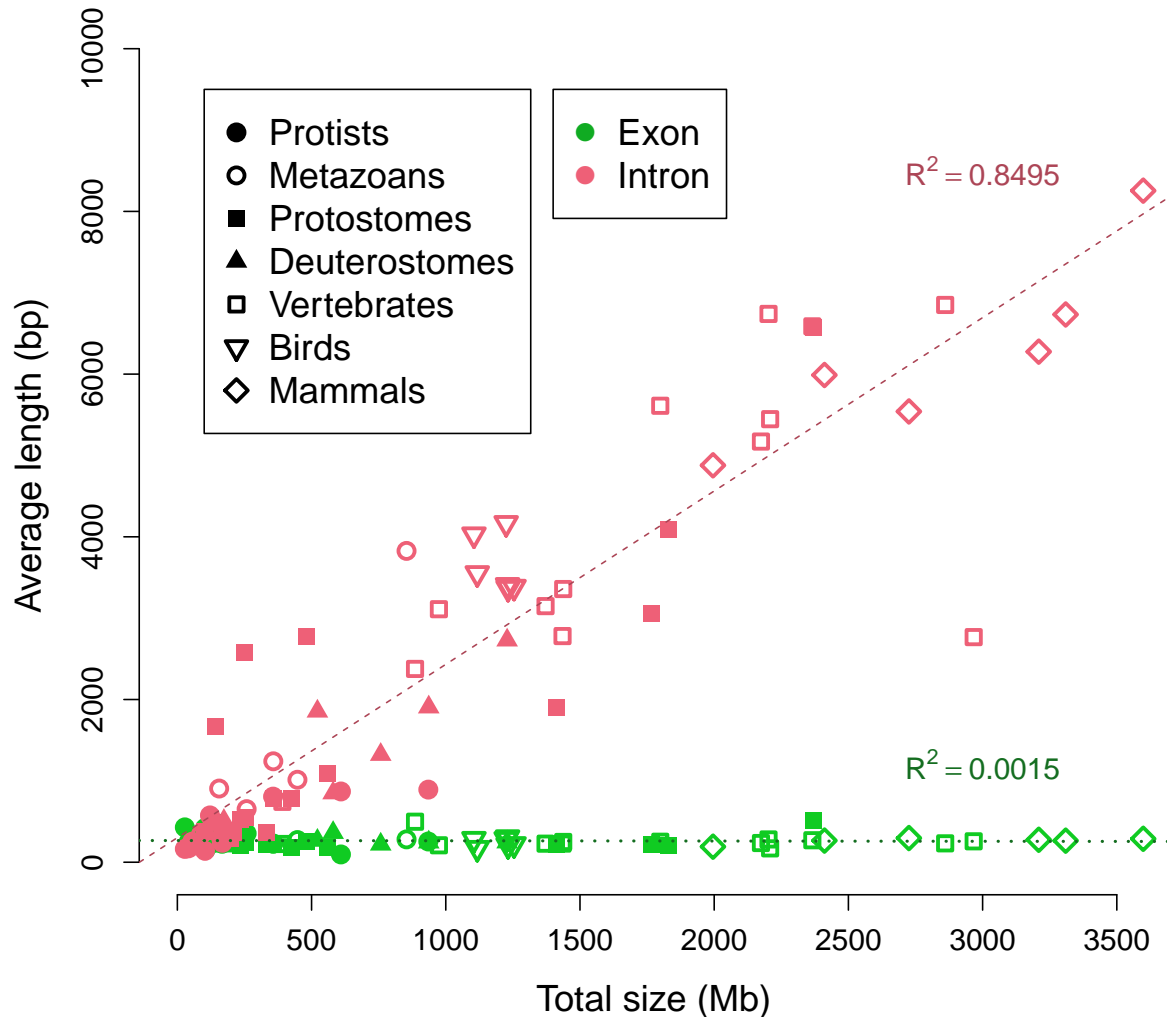

Figure 7: **Average length of exons and introns** Plot of the average length of exons (green) and introns (pink) as a function of total genome size across all species in this study. Linear correlation coefficients are displayed next to the green (dotted) and red (dashed) linear fit lines, for exons and introns, respectively.

### 318 Nature of the exonic fraction

319 The total amount of exons is not strongly correlated with total genome size (as seen in Fig 6). However, there  
320 is a hyperbolic correlation of the relative fraction of exons (megabases of exons divided by total megabases)  
321 compared to total genome size (Fig 8). The smallest genomes are dominated by exons, while the largest  
322 genomes are dominated by introns and intergenic regions. This implies a relatively fixed pool of exons or

323 coding space that becomes spread over the genome as the total size increases. The hyperbolic trend resem-  
324 bled the observed hyperbolic relationship between total genome size and coding proportion [18]. As coding  
325 exons are a subset of total exons, measurements of total exons may be a reasonable approximation of coding  
326 sequence, but not necessarily vice versa.  
327

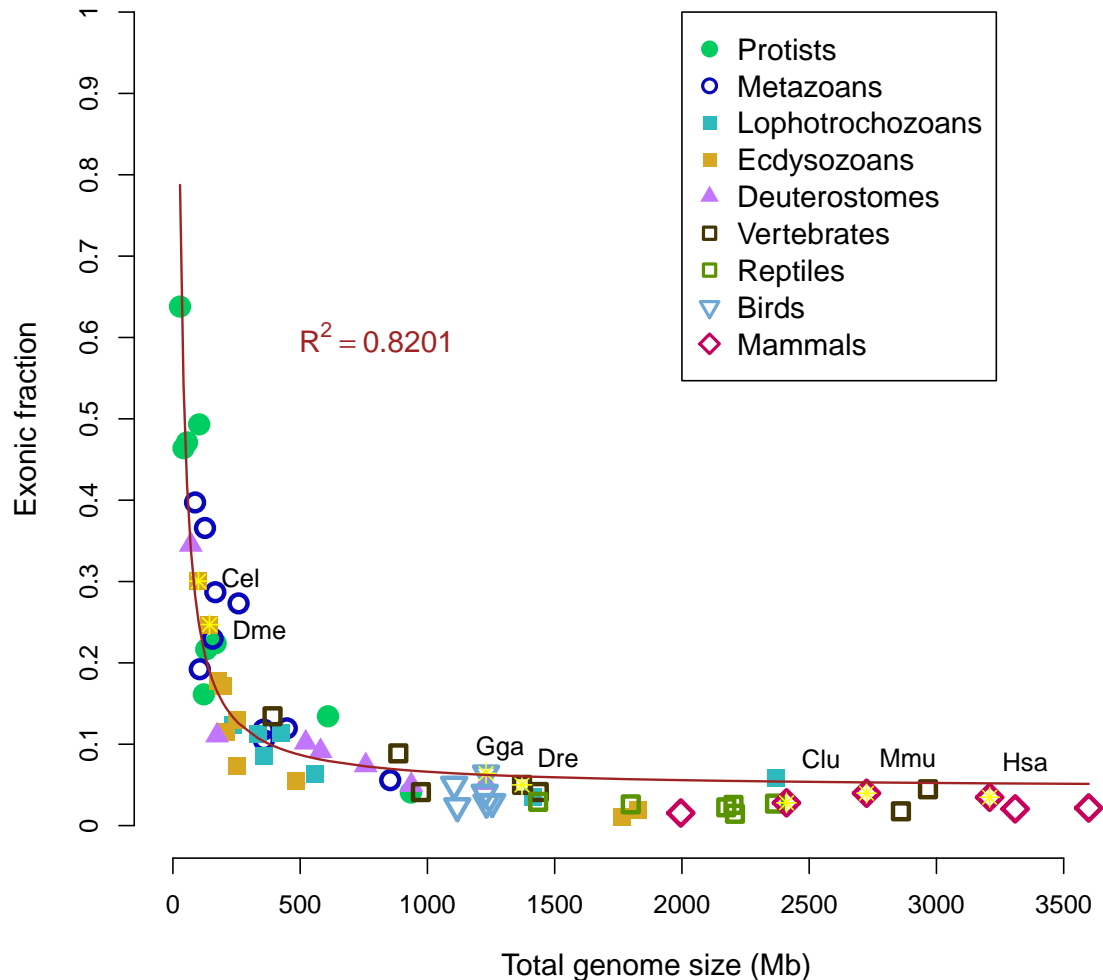

Figure 8: **Exonic fraction compared to total genome size** Relative fraction of the genome that is defined as exons compared as a function of total size. Correlation coefficient of a hyperbolic model is displayed. Seven model organisms (human, mouse, dog, chicken, zebrafish, fruit fly and nematode) are indicated by the yellow stars.

### 328 Ratio of introns to intergenic

329 Because both intronic and intergenic fractions displayed a linear correlation to total genome size (Fig 6),  
330 we next examined the connection between the two fractions. While many species have a ratio of in-  
331 trons:intergenic approaching 1:1 (R-squared: 0.8286, p-value:  $5.6 \times 10^{-27}$ ), the majority of genomes are  
332 composed of sequence annotated as intergenic regions (Fig 9).  
333

334 Because of the potential issue of gene annotation accuracy, we tested the linear correlation of in-

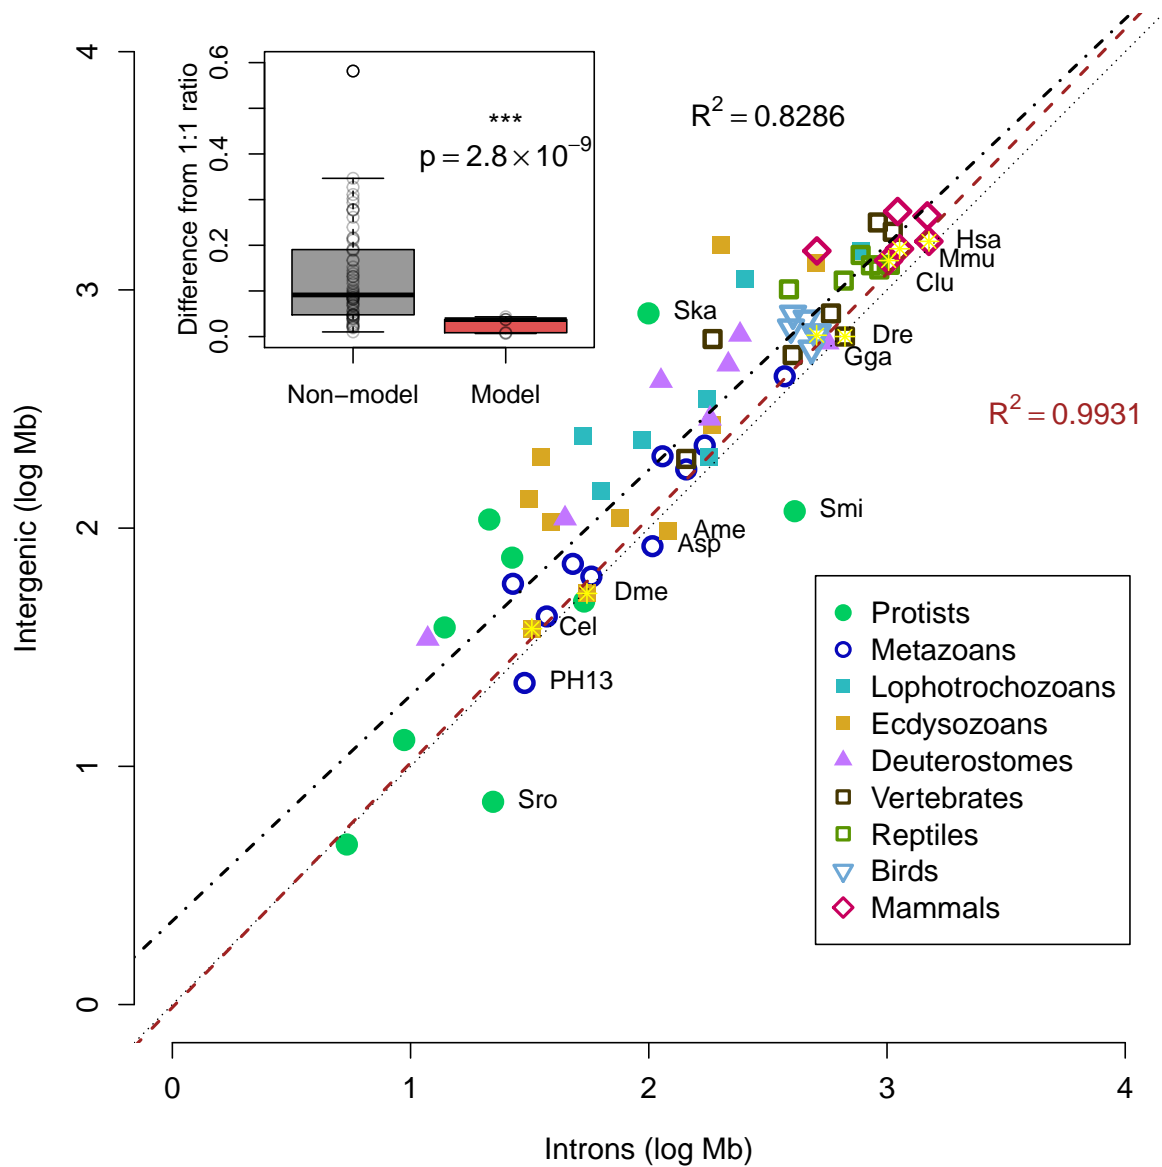

Figure 9: **Comparing intronic and intergenic fractions** Log-scale plot of total intronic size versus total intergenic size. The dotted line shows a ratio of 1:1 as a reference, although most genomes are above this line. Seven model organisms (as in Fig 8) are indicated by the yellow stars. Black dashed line displays the linear fit of all species in the study (R-squared: 0.8286, p-value:  $5.6 \times 10^{-27}$ ), while the red line displays the linear fit for only the seven model organisms (R-squared: 0.9931, p-value:  $1.3 \times 10^{-6}$ ). Names are displayed for model species, two dinoflagellates (Ska: *S. kawagutii*, Smi: *S. minutum*) and select species with ratios of intron:intergenic greater than 1, choanoflagellate *S. rosetta* (Sro), honeybee *A. mellifera* (Ame), anemone *Aiptasia sp.* (Asp), and Undescribed placozoan H13 (PH13). All other species names are omitted for clarity. The inset graph shows box plot of difference of the intron:intergenic ratio to 1, showing the model organisms (red) have significantly different ratios compared to the rest of the genomes (paired two-end t-test, p-value:  $2.8 \times 10^{-9}$ ).

335 trons:intergenic sequence for seven model organisms likely to have accurate annotations. A better linear  
 336 fit was observed when restricted to the model organisms (R-squared: 0.9931, p-value= $1.3 \times 10^{-6}$ ), sug-



337 gesting that deviations from the 1:1 ratio of intron:intergenic sequence are due to missing annotations,  
338 rather than biological differences. Genomes of model organisms are significantly closer to the reference line  
339 (two-tailed t-test, p-value:  $< 10^{-7}$  for both absolute distance from 1:1 reference or absolute difference of  
340 intron:intergenic ratio to 1), suggesting that the better annotations of model organisms predict a ratio of  
341 1:1 of intron:intergenic sequence. Overall, the comparison of genomes of model to non-model organisms is  
342 compatible with the hypothesis that the predicted amount of the genome that is transcribed varies more by  
343 annotation quality than biological differences.

344  
345 We then examined if there is a difference between genomes of vertebrates and invertebrates. No sig-  
346 nificance difference is observed between the two model invertebrates and five vertebrates (two-tailed t-test,  
347 p-value:0.99). Among all species in the study, significant differences are tenuous and highly dependent on  
348 the species selected. For example, chordates against non-chordates is not significant (p-value:0.128) while  
349 vertebrates against invertebrates is significant (p-value:0.008). However, the observed significance appears  
350 to be an artifact of the abundance of low-quality genomes of protostomes, since comparison of vertebrates  
351 against non-bilaterians is not significant (p-value:0.83). This difference is most simply explained by the  
352 similarity between vertebrate groups. That is to say, annotation of a new mammalian genome is facilitated  
353 by existing knowledge of gene structures in other mammals.

354  
355 Several genomes are below the 1:1 reference line, indicating slightly more introns than intergenic, such  
356 as the choanoflagellate *S. rosetta*, the honeybee *A. mellifera*, the anemone *Aiptasia sp.*, and Undescribed  
357 placozoan H13. For *A. mellifera*, it was noted that improvements in versions of the genome also included  
358 better placement of repetitive intergenic sequences [71], suggesting that the relative surplus of introns is  
359 merely due to the absence of some intergenic sequences in the final assembly. As for *Aiptasia sp.* and Unde-  
360 scribed placozoan H13, these species stand out as having relatively high heterozygosity, 0.4% [87] and 1.8%  
361 (manuscript in preparation), respectively. Although these values are lower than the observed heterozygosity  
362 in many other invertebrates [88], some highly heterozygous sequences may have caused assembly problems  
363 during scaffolding (as proposed in Fig 3).

## 365 Evolution of the genic fraction

366 The amount of the genome that is composed of genes was highly variable across the genomes in our study,  
367 ranging from 12.5% up to 87.1% of the genome. Unlike the exonic fraction, the relationship of the fraction  
368 of the genome that is genes to the total size is less obvious (Fig 10), in part because this parameter is most  
369 subject to gene annotation accuracy. The fraction of the genome that is exons (and perhaps coding) ap-  
370 peared relatively fixed (Fig 8), yet the fraction that is intron was linearly correlated to the total size (Fig 6),  
371 therefore the fraction that is genes (exons and introns combined) was expected to be a combination of the two  
372 modes. Three correlation models were tested: hyperbolic (double-log), exponential (single-log), and linear.  
373 Of these, the hyperbolic model fit best (R-square: 0.3649, p-value:  $< 10^{-8}$ ), and no correlation was found  
374 for the other models. Restricting the linear model to only genomes larger than 500Mb found essentially no  
375 correlation (R-squared:  $2.5 * 10^{-4}$ ), suggesting that the genic fraction is unrelated to total genome size in  
376 large genomes but not small genomes.

377  
378 Again, the importance of gene annotation accuracy cannot be ignored and needs to be emphasized. When  
379 restricting to the seven model organisms, the range of values is narrower, from 44.9% to 62.9%. The same  
380 three correlation models were applied to the genomes of model organisms, again finding that the hyperbolic  
381 model best explained the variation in the genic fraction of model organisms (hyperbolic R-squared: 0.8091,  
382 p-value=0.0058; exponential R-squared=0.6709; linear R-squared=0.6835). Rather than simply having no  
383 correlation to total size, these results suggest that the genic fraction is fixed at around 50% in large genomes.

384

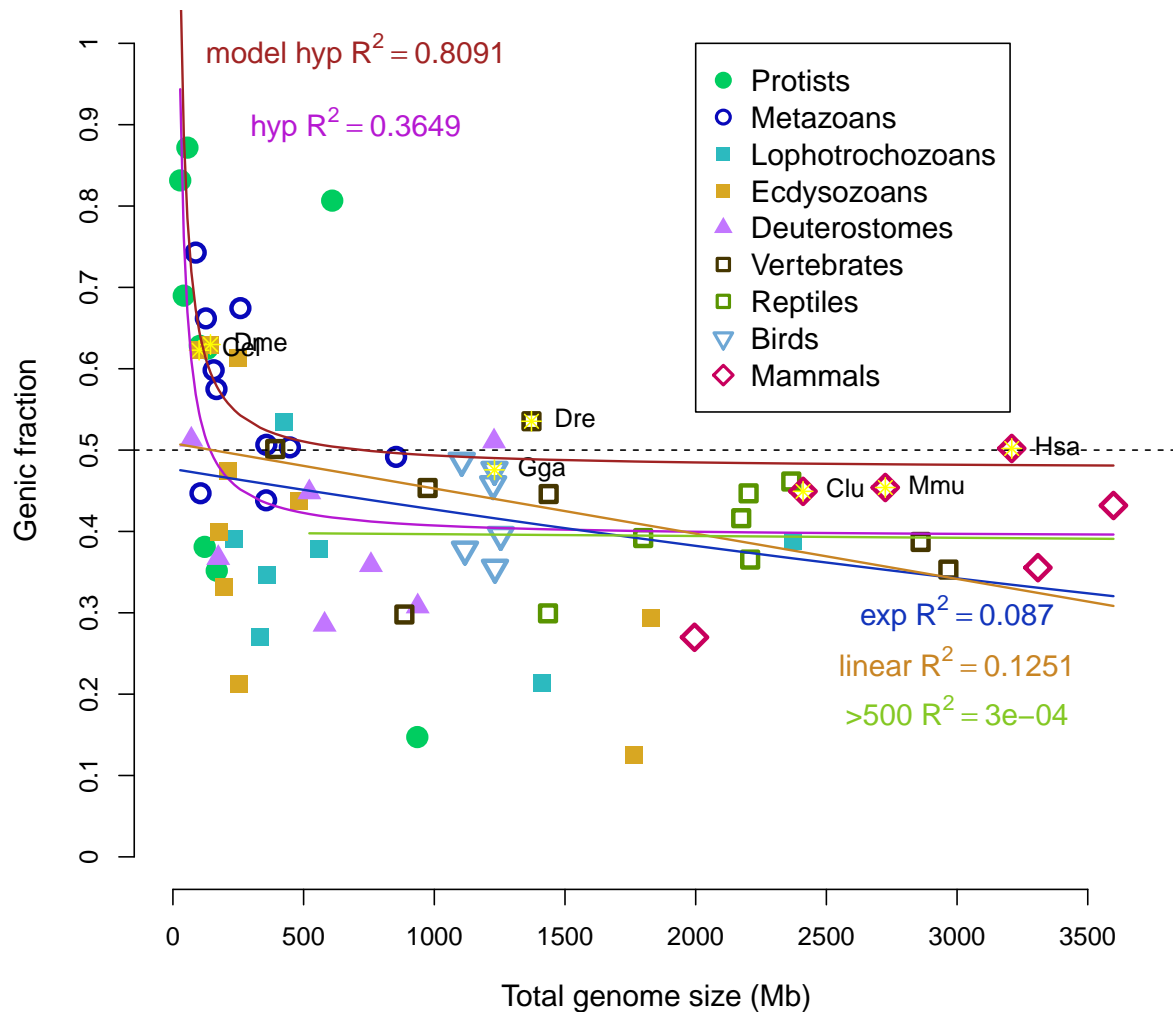

Figure 10: **Genic fraction compared to total genome size** Relative fraction of the genome that is defined as genes compared as a function of total size. A number of correlative models (hyperbolic in purple, exponential in blue, linear in orange) were tested and coefficients are displayed. Linear correlation is expected to be zero if genic and intergenic fractions “expand” indifferently after a certain size, which appears to be around 500Mb. Linear correlation including only genomes larger than 500Mb is also displayed as the green line. Seven model organisms (as in Fig 8) are indicated by the yellow stars. The hyperbolic correlation model for the seven model organisms is shown in red.

## 385 Discussion

### 386 Diagnostic relationship of introns to intergenic sequence

387 An increasing number of genomes of any non-model organisms are sequenced to answer evolutionary ques-  
388 tions. For example, genomes of taxa from all four non-bilaterian groups were recently sequenced to under-  
389 stand how similar these genomes are to humans [8,24,33,34], and found that we share much more in terms of  
390 genes with these groups than had been previously thought. Yet, one of the main challenges in studying the  
391 genomes of non-model organisms is that there is little *a priori* information about gene structure or content.  
392 It would be expected that finding orthologs of human genes is relatively easy, but does not inform us about  
393 other genes that differ from humans. How should we know when we have found all of the genes? Our results  
394 provide some guidance here and suggest that there is a constant ratio of introns to intergenic sequence in  
395 all animals. This relationship holds even for animals with small genomes, such as the model organisms *D.*  
396 *melanogaster* and *C. elegans*, suggesting that organisms with small genomes and many currently sequenced  
397 invertebrates are subject to the same forces as organisms with large genomes.

### 399 Unusual cases of genomes

400 Based on our model, the majority of genomes appear to be underannotated, in that substantial portions of  
401 the genome are not predicted to be transcribed when in fact many probably are. However, only two species,  
402 the lancelet *B. floridae* and the dinoflagellate *S. minutum*, display a dramatic trend in the opposite way,  
403 that is, the majority of the genome is annotated as genic (being primarily introns).

404  
405 For the lancelet *B. floridae*, the original JGI gene models had annotated almost 90% of the genome as  
406 genes [23], the majority (85%) of that sequence being introns. Our reannotation of this genome displays the  
407 opposite trend, where more of the genome is intergenic than intronic. The original JGI annotations did not  
408 include any validation of the predicted genes, as predictions were made using mapped ESTs only as inputs  
409 for the gene model training. From this, we consider it more likely that the RNAseq-based transcripts more  
410 accurately resemble the true gene structures, albeit missing some genes. However, other evidence suggests  
411 that the *B. floridae* annotations may have been unusual or erroneous [89]. A study of domain combinations  
412 found that *B. floridae* had by far more fusions than any other species (across all eukaryotes) and had to be  
413 excluded from the analysis [90], precisely the expected result if the majority of genes were erroneously fused.

414  
415 The only other species have a much larger ratio of intron to intergenic was the dinoflagellate *S. minutum*.  
416 It was described that its genome contained many long stretches of genes on the same strand, sometimes  
417 continuing for hundreds of kilobases [41]. The authors also note that the *de novo* assembled transcriptome  
418 appears to contain transcripts spanning multiple genes and containing multiple open reading frames, indi-  
419 cating the possibility that dinoflagellate symbionts can make cistronic transcripts. This species is not an  
420 animal, so it should not be assumed that animal modes of transcription are conserved across all eukaryotes.  
421 However, it should be noted that a recently published genome of another symbiotic dinoflagellate species *S.*  
422 *kawagutii* [40] does not display the same pattern, and instead appears to have a much greater fraction of  
423 intergenic regions than introns.

### 425 Genome composition across metazoa

426 Previous studies have discussed problems with trying to relate the number of genes to the size of the  
427 genome [91–93]. One study [18] found a weak positive correlation between genome size and number of genes.  
428 This parallels our finding that total exonic sequence is weakly correlated to total genome size (Fig 6). How-  
429 ever, this measurement can be problematic if the genome assembly is highly fragmented, containing a large  
430 number of short contigs or scaffolds. In such cases, gene number is unlikely to a relationship to genome  
431 size for the same reason as the difficulties in predicting the genic fraction, that is, it is strongly affected by  
432 gene annotation errors. In our schematic (Fig 2), a gene that is split up onto three contigs would therefore  
433 be counted as three genes, albeit short ones. If this occurs on a genome-wide scale, the count of genes will

434 be inaccurate. Parts of genes would be individually annotated as genes, increasing the total gene number  
435 without much change to the total number of exonic bases.

436  
437 Rather than relying on counts of genes or determining coding sequence, we instead examined sequence  
438 that is annotated as exons. We found that the exonic fraction is largely unchanged with the total size of  
439 the genome, showing that most of the difference in size is related to introns and intergenic sequence. The  
440 amount of the genome that is composed of introns is linearly related to the total genome size (Fig 6). Also  
441 considering the measured linear correlation of intergenic sequence to total size, it is not surprising that most  
442 species have roughly a 1:1 ratio of introns:intergenic sequence (Fig 9). This appears to be the case regardless  
443 of the size of the genome or the total exon sequence. For instance, the genome of the choanoflagellate *M. bre-*  
444 *vicollis* has 9.3Mb of introns and 10.1Mb of intergenic sequence (a ratio of 0.92) compared to 19.3Mb of exons.

445  
446 Therefore, model animals (and probably all animals) transcribe at least half of the genome, where species  
447 with smaller genomes transcribe more than half. There does not appear to be a significant difference in the  
448 genic fraction based on animal group, that is, all animals appear to follow this rule. One study had shown  
449 that some larger metazoan genomes were depleted in genes [94], yet this study made use of a small number  
450 of species for comparison and included several chordates known for their very small genomes, the tunicate *C.*  
451 *intestinalis* and the pufferfish *T. rubripes*. The authors examined windows of 50kb and found that 80% of the  
452 human genome was lacking any gene [94], though it is unclear if this analysis was restricted to protein cod-  
453 ing genes. However, we found that 50.2% of the human genome is composed of genes (93% of that is introns).

454  
455 A large number of the genomes in this study appear to be composed of less than 50% genes. We propose  
456 that the observed data are compatible with the hypothesis that most genomes are missing genes, which may  
457 be coding (perhaps lineage-specific proteins) or not. Because annotation of the genome by RNAseq per se  
458 cannot distinguish coding genes from non-coding ones, the coding fraction may still contribute heavily to the  
459 total amount of exons. Even for putative non-coding transcripts, some may be coding [95–97], thus protein  
460 sequencing may reveal the true nature of these transcripts.

## 461 462 Evolution of genomes

463 The genic fraction has a hyperbolic relationship to the total genome size. The modeled curve flattens around  
464 500Mb, after that point, introns and intergenic regions are expected to expand, on average, equally across  
465 the genome resulting in approximately 50% of the genome as genes (the majority of that being introns) and  
466 the other 50% as intergenic sequence.

467  
468 It has been theorized that changes in genome size are a balance between short deletions and long in-  
469 sertions [98]. If the last common ancestor of all metazoans had a relatively small genome (under 100Mb,  
470 resembling some single-cell eukaryotes in our study), then the majority of modern animals have undergone  
471 dramatic expansion of their genomes, meaning dominated by insertions or duplications. How does this ex-  
472 pansion occur and does it favor a novel origin of introns or expansion of intergenic sequences? Following  
473 the trend in Fig 9 and Fig 10, it appears that small genomes are dominated by genes, and both genes and  
474 intergenic sequences are expanded in equally as the genomes enlarge. Mechanistically, these insertions are  
475 likely to be mediated by transposable elements. As small genomes become invaded by transposable ele-  
476 ments, introns appear and expand at roughly the same rate as intergenic sequences producing a 1:1 ratio of  
477 intron:intergenic across all species (Fig 9).

478  
479 Above a certain size (around 500Mb), genic and intergenic sequences expand equally, where 50% of the  
480 genome is genic; exons comprise an almost negligible fraction of the genome, which is otherwise composed  
481 of approximately equal fractions of introns and intergenic sequences. This might be explained by changes  
482 in diversity of transposable elements, as the highest diversity was found in genomes ranging from 500Mb to  
483 1.5Gb [17]. Larger genomes appeared to be flooded by transposable elements of a single type. Thus, above  
484 500Mb, it can be predicted that select transposable elements become prevalent and multiply throughout the  
485 genome, but on average end up expanding introns and intergenic sequences equally.

486

## 487 Relationship to phenotypic complexity

488 The size of the genome can vary greatly even for closely related organisms. This has been called the “c-value  
489 paradox” [1,99], based on the observation that although the many organisms have larger genomes relative to  
490 similar species (bigger “c-value”), this measurement does not relate to complexity in a straightforward way.  
491 A classic example of this is frog genus *Xenopus*, where the genome of the species *X. laevis* is almost twice  
492 as large as the species *X. tropicalis* [100], though the animal is not twice as “complex”. Similar observations  
493 have been made that the number of genes appears unrelated to the size of the genome and the complexity  
494 (sometimes called the “g-value paradox” [91,101]).

495

496 If neither genome size nor gene number are clearly related to complexity, then what is? Another relation-  
497 ship has been proposed between the usage of alternative splice variants and organismic complexity because  
498 variation in splicing can increase the number of potential proteins from an overall fixed pool of exons [102].  
499 Vertebrates and specifically mammals tend to splice transcripts more than invertebrates (meaning models  
500 fruit fly and nematode) [103,104]. One study reported a good correlation (R-squared of 0.80) of splicing to  
501 organismic complexity measured by cell types [105], but also reported that this trend effectively disappeared  
502 when correcting for sequencing depth, using the number of ESTs available as a proxy for annotation quality.  
503 The largest invertebrate genome used in that study was the deer tick *I. scapularis*, which did have a mea-  
504 sured number of cell types but unfortunately could not be analyzed further, leaving the bulk of the analysis  
505 weighted heavily by mammals and small-genome insects.

506

507 However, other studies report that alternative splicing is more frequent when the surrounding introns  
508 are long [106,107], suggesting that organisms with large genomes (and therefore larger introns) might be  
509 predisposed to splice. This could suggest that some of the invertebrates in our study may have more complex  
510 splicing patterns than are annotated in the current genome versions. For the largest invertebrate genome in  
511 our study, the octopus *O. bimaculoides*, only 14.8% of loci appeared to have alternative splice variants [45].  
512 Indeed, in our reannotation we found only 16.9% of loci have any type of splice variant. However, the ma-  
513 jority of predicted loci are single exon (75%), possibly many genes are fragmented across multiple contigs.  
514 When restricted to loci with multiple exons, 68% have more than one variant. These data from *O. bimac-*  
515 *uloides* seem to contradict the role of splicing in complexity, or more specifically, that overall patterns in  
516 splicing do not display a reliable connection to organismic complexity when complexity is generalized across  
517 animal groups. However, without proper measurements of cell types from the octopus, it cannot be assumed  
518 that the number of cell types resembles the value for the fruit fly, which was implicit in other studies given  
519 that protostomes were effectively represented by insects. Thus, it could be the case that the octopus has a  
520 large genome, a large number of cell types, and many genes are spliced, all in agreement with the splicing  
521 complexity hypothesis.

522

523 It is a challenge to separate these observations from biases in sequencing depth (of transcripts or ESTs)  
524 and data availability. In our study, we could only make use of five invertebrates with relatively large genomes,  
525 the cnidarian *H. magnipapillata*, the pearl oyster *P. fucata*, the horseshoe crab *L. polyphemus*, the deer tick  
526 *I. scapularis*, and the octopus *O. bimaculoides*. On the other hand, NCBI has over 100 genomes of mammals  
527 available for download. Alternatively, the repertoire of splice factors or the genes that are most spliced may  
528 be of greater importance than just splicing in general. Our understanding is likely to be improved with more  
529 deeply-sequenced transcriptomes from large-genome invertebrates.

## 530 Limitations

531 Because we were making use of mostly public data, our analyses were subject to both technical and biologi-  
532 cal limitations. There are a small number of taxa with sequenced genomes from many invertebrate groups.  
533 Because the majority of sequenced vertebrate genomes are large and the majority of sequenced invertebrate  
534 genomes are small [92], the axis of simple invertebrate to complex vertebrate is synonymous with small to  
535 large genomes, and thus the prevalence of splicing in large-genome animals may be a consequence of the size  
536 of the genome and complexity may be only correlated. This issue is not simple to resolve, as there may not

537 be members in all animal groups with both small and large genomes. For instance, a survey of genome sizes  
538 across Porifera stated that the largest genome out of the 70 species sampled was around 600Mb [108]. Thus,  
539 there may not be any “large” genomes in this phylum, and likewise for other invertebrate groups. Compared  
540 to birds, however, where the smallest genome identified to date is from the black-chinned hummingbird  
541 (estimated 910Mb) [109], perhaps no bird will be found that has a “small” genome.

542

## 543 Conclusion

544 We have shown that all animals transcribe at least half of their genomes in a size-dependent fashion. For large  
545 genomes, the amount of exons is almost negligible, where introns account for most of the genic sequence. In  
546 such cases, genic sequence is almost equal to the amount of intergenic sequence. Whereas for small genomes,  
547 exons can be a major fraction of the genome, resulting in the appearance of gene-dense genomes. This  
548 parity between introns and intergenic sequence is a universal feature of animal genomes, and indicates that  
549 most genomes could benefit from new annotations. Previous findings of genomic differences between animal  
550 groups are likely to result from a sampling bias, rather than biological differences. Future sequencing of more  
551 high-quality genomes from animals may reveal unanticipated sources of complexity and gene regulation with  
552 implications for the evolution of animals.

## 553 Acknowledgments

554 W.R.F would like to thank M. Eitel for helpful comments on the manuscript. This work was supported by a  
555 LMUexcellent grant (Project MODELSPONGE) to G.W. as part of the German Excellence Initiative. The  
556 authors declare no competing interests.

## 557 References

- 558 [1] Thomas CA. The Genetic Organization of Chromosomes. *Annual review of genetics*. 1971;5(1):237–  
559 256. doi:10.1146/annurev.ge.05.120171.001321.
- 560 [2] Han K, Li Zf, Peng R, Zhu Lp, Zhou T, Wang Lg, et al. Extraordinary expansion of a Sorangium  
561 cellulosum genome from an alkaline milieu. *Scientific reports*. 2013;3:2101. doi:10.1038/srep02101.
- 562 [3] Brent MR. Steady progress and recent breakthroughs in the accuracy of automated genome annotation.  
563 *Nature reviews Genetics*. 2008;9(1):62–73. doi:10.1038/nrg2220.
- 564 [4] Guigó R, Flicek P, Abril JF, Reymond A, Lagarde J, Denoeud F, et al. EGASP: the human EN-  
565 CODE Genome Annotation Assessment Project. *Genome biology*. 2006;7 Suppl 1(Suppl 1):S2.1–31.  
566 doi:10.1186/gb-2006-7-s1-s2.
- 567 [5] Vallender EJ. Bioinformatic approaches to identifying orthologs and assessing evolutionary relation-  
568 ships. *Methods*. 2009;49(1):50–55. doi:10.1016/j.jymeth.2009.05.010.
- 569 [6] Zhang X, Goodsell J, Norgren RB. Limitations of the rhesus macaque draft genome assembly and  
570 annotation. *BMC genomics*. 2012;13(1):206. doi:10.1186/1471-2164-13-206.
- 571 [7] Altenhoff AM, Boeckmann B, Capella-Gutierrez S, Dalquen DA, DeLuca T, Forslund K, et al.  
572 Standardized benchmarking in the quest for orthologs. *Nature Methods*. 2016;13(5):425–430.  
573 doi:10.1038/nmeth.3830.
- 574 [8] Ryan JF, Pang K, Schnitzler CE, a D Nguyen Ad, Moreland RT, Simmons DK, et al. The  
575 Genome of the Ctenophore Mnemiopsis leidyi and Its Implications for Cell Type Evolution. *Science*.  
576 2013;342(6164):1242592–1242592. doi:10.1126/science.1242592.



- 577 [9] Pisani D, Pett W, Dohrmann M, Feuda R, Rota-Stabelli O, Philippe H, et al. Genomic data do not  
578 support comb jellies as the sister group to all other animals. *Proceedings of the National Academy of*  
579 *Sciences*. 2015;112(50):201518127. doi:10.1073/pnas.1518127112.
- 580 [10] Parra G, Bradnam K, Korf I. CEGMA: a pipeline to accurately annotate core genes in eukaryotic  
581 genomes. *Bioinformatics (Oxford, England)*. 2007;23(9):1061–7. doi:10.1093/bioinformatics/btm071.
- 582 [11] Simão FA, Waterhouse RM, Ioannidis P, Kriventseva EV. BUSCO : assessing genome assem-  
583 bly and annotation completeness with single-copy orthologs. *Genome analysis*. 2015;31(June):9–10.  
584 doi:10.1093/bioinformatics/btv351.
- 585 [12] Lynch M, Conery JS. The origins of genome complexity. *Science (New York, NY)*. 2003;302(5649):1401–  
586 4. doi:10.1126/science.1089370.
- 587 [13] Lynch M. Response to Comment on "The Origins of Genome Complexity". *Science*.  
588 2004;306(5698):978b–978b. doi:10.1126/science.1100559.
- 589 [14] Daubin V, Moran Na. Comment on "The origins of genome complexity". *Science (New York, NY)*.  
590 2004;306(5698):978; author reply 978. doi:10.1126/science.1098469.
- 591 [15] Pettersson ME, Kurland CG, Berg OG. Deletion rate evolution and its effect on genome size and  
592 coding density. *Molecular Biology and Evolution*. 2009;26(6):1421–1430. doi:10.1093/molbev/msp054.
- 593 [16] Kidwell MG. Transposable elements and the evolution of genome size in eukaryotes. *Genetica*.  
594 2002;115(1):49–63. doi:10.1023/A:1016072014259.
- 595 [17] Elliott TA, Gregory TR. Do larger genomes contain more diverse transposable elements? *BMC*  
596 *evolutionary biology*. 2015;15(1):69. doi:10.1186/s12862-015-0339-8.
- 597 [18] Elliott TA, Gregory TR. What's in a genome? The C-value enigma and the evolution of eukaryotic  
598 genome content. *Phil Trans R Soc B*. 2015;370(1678):20140331. doi:10.1098/rstb.2014.0331.
- 599 [19] Canapa A, Barucca M, Biscotti MA, Forconi M, Olmo E. Transposons, Genome Size, and Evolutionary  
600 Insights in Animals. *Cytogenetic and Genome Research*. 2016; p. 217–239. doi:10.1159/000444429.
- 601 [20] Deutsch M, Long M. Intron-exon structures of eukaryotic model organisms. *Nucleic acids research*.  
602 1999;27(15):3219–28.
- 603 [21] Zhu L, Zhang Y, Zhang W, Yang S, Chen JQ, Tian D. Patterns of exon-intron architecture variation  
604 of genes in eukaryotic genomes. *BMC genomics*. 2009;10(1):47. doi:10.1186/1471-2164-10-47.
- 605 [22] Dehal P, Satou Y, Campbell RK, Chapman J, Degnan B, De Tomaso A, et al. The draft genome  
606 of *Ciona intestinalis*: insights into chordate and vertebrate origins. *Science (New York, NY)*.  
607 2002;298(5601):2157–2167. doi:10.1126/science.1080049.
- 608 [23] Putnam NH, Butts T, Ferrier DEK, Furlong RF, Hellsten U, Kawashima T, et al. The am-  
609 phioxus genome and the evolution of the chordate karyotype. *Nature*. 2008;453(7198):1064–71.  
610 doi:10.1038/nature06967.
- 611 [24] Srivastava M, Begovic E, Chapman J, Putnam NH, Hellsten U, Kawashima T, et al. The Trichoplax  
612 genome and the nature of placozoans. *Nature*. 2008;454(7207):955–60. doi:10.1038/nature07191.
- 613 [25] Simakov O, Marletaz F, Cho SJ, Edsinger-Gonzales E, Havlak P, Hellsten U, et al. Insights into bilate-  
614 rian evolution from three spiralian genomes. *Nature*. 2013;493(7433):526–31. doi:10.1038/nature11696.
- 615 [26] Simakov O, Kawashima T, Marlétaz F, Jenkins J, Koyanagi R, Mitros T, et al. Hemichordate genomes  
616 and deuterostome origins. *Nature*. 2015; p. 1–19. doi:10.1038/nature16150.
- 617 [27] King N, Westbrook MJ, Young SL, Kuo A, Abedin M, Chapman J, et al. The genome of the  
618 choanoflagellate *Monosiga brevicollis* and the origin of metazoans. *Nature*. 2008;451(7180):783–8.  
619 doi:10.1038/nature06617.



- 620 [28] Read Ba, Kegel J, Klute MJ, Kuo A, Lefebvre SC, Maumus F, et al. Pan genome of the phytoplankton  
621 *Emiliania underpins its global distribution*. *Nature*. 2013; p. 9–13. doi:10.1038/nature12221.
- 622 [29] Prochnik SE, Umen J, Nedelcu AM, Hallmann A, Miller SM, Nishii I, et al. Genomic analysis  
623 of organismal complexity in the multicellular green alga *Volvox carteri*. *Science (New York, NY)*.  
624 2010;329(5988):223–6. doi:10.1126/science.1188800.
- 625 [30] Suga H, Chen Z, de Mendoza A, Sebé-Pedrós A, Brown MW, Kramer E, et al. The *Capsaspora*  
626 genome reveals a complex unicellular prehistory of animals. *Nature communications*. 2013;4:2325.  
627 doi:10.1038/ncomms3325.
- 628 [31] Fairclough SR, Chen Z, Kramer E, Zeng Q, Young S, Robertson HM, et al. Premetazoan genome  
629 evolution and the regulation of cell differentiation in the choanoflagellate *Salpingoeca rosetta*. *Genome*  
630 *biology*. 2013;14(2):R15. doi:10.1186/gb-2013-14-2-r15.
- 631 [32] Fernandez-Valverde SL, Calcino AD, Degnan BM. Deep developmental transcriptome sequencing  
632 uncovers numerous new genes and enhances gene annotation in the sponge *Amphimedon queenslandica*.  
633 *BMC Genomics*. 2015;16(1):1–11. doi:10.1186/s12864-015-1588-z.
- 634 [33] Srivastava M, Simakov O, Chapman J, Fahey B, Gauthier MEa, Mitros T, et al. The *Amphime-*  
635 *don queenslandica* genome and the evolution of animal complexity. *Nature*. 2010;466(7307):720–6.  
636 doi:10.1038/nature09201.
- 637 [34] Putnam NH, Srivastava M, Hellsten U, Dirks B, Chapman J, Salamov A, et al. Sea anemone genome  
638 reveals ancestral eumetazoan gene repertoire and genomic organization. *Science (New York, NY)*.  
639 2007;317(5834):86–94. doi:10.1126/science.1139158.
- 640 [35] Moran Y, Fredman D, Praher D, Li XZ, Wee LM, Rentzsch F, et al. Cnidarian microRNAs frequently  
641 regulate targets by cleavage. *Genome Research*. 2014;24(4):651–663. doi:10.1101/gr.162503.113.
- 642 [36] Fortunato SaV, Adamski M, Ramos OM, Leininger S, Liu J, Ferrier DEK, et al. Calcisponges have a  
643 *ParaHox* gene and dynamic expression of dispersed NK homeobox genes. *Nature*. 2014;514(7524):620–  
644 623. doi:10.1038/nature13881.
- 645 [37] Voskoboynik A, Neff NF, Sahoo D, Newman AM, Pushkarev D, Koh W, et al. The genome sequence  
646 of the colonial chordate, *Botryllus schlosseri*. *eLife*. 2013;2:e00569. doi:10.7554/eLife.00569.
- 647 [38] Baumgarten S, Simakov O, Esherick LY, Liew YJ, Lehnert EM, Michell CT, et al. The genome of  
648 *Aiptasia*, a sea anemone model for coral symbiosis. *Proceedings of the National Academy of Sciences*.  
649 2015; p. 201513318. doi:10.1073/pnas.1513318112.
- 650 [39] Denoed F, Henriët S, Mungpakdee S, Aury JM, Da Silva C, Brinkmann H, et al. Plasticity of Animal  
651 Genome Architecture Unmasked by Rapid Evolution of a Pelagic Tunicate. *Science*. 2010;1381(2010).  
652 doi:10.1126/science.1194167.
- 653 [40] Lin S, Cheng S, Song B, Zhong X, Lin X, Li W, et al. The *Symbiodinium kawagutii* genome  
654 illuminates dinoflagellate gene expression and coral symbiosis. *Science*. 2015;350(6261):691–694.  
655 doi:10.1126/science.aad0408.
- 656 [41] Shoguchi E, Shinzato C, Kawashima T, Gyoja F, Mungpakdee S, Koyanagi R, et al. Draft Assembly of  
657 the *Symbiodinium minutum* Nuclear Genome Reveals Dinoflagellate Gene Structure. *Current biology*  
658 : *CB*. 2013;23:1399–1408. doi:10.1016/j.cub.2013.05.062.
- 659 [42] Takeuchi T, Kawashima T, Koyanagi R, Gyoja F, Tanaka M, Ikuta T, et al. Draft genome of  
660 the pearl oyster *Pinctada fucata*: a platform for understanding bivalve biology. *DNA research : an international journal for rapid publication of reports on genes and genomes*. 2012;19(2):117–30.  
661 doi:10.1093/dnares/dss005.  
662

- 663 [43] Shinzato C, Shoguchi E, Kawashima T, Hamada M, Hisata K, Tanaka M, et al. Using the *Acropora*  
664 *digitifera* genome to understand coral responses to environmental change. *Nature*. 2011;476(7360):320–  
665 3. doi:10.1038/nature10249.
- 666 [44] Luo YJ, Takeuchi T, Koyanagi R, Yamada L, Kanda M, Khalturina M, et al. The *Lingula* genome  
667 provides insights into brachiopod evolution and the origin of phosphate biomineralization. *Nature*  
668 *Communications*. 2015;6:1–10. doi:10.1038/ncomms9301.
- 669 [45] Albertin CB, Simakov O, Mitros T, Wang ZY, Pungor JR, Edsinger-gonzales E, et al. The  
670 octopus genome and the evolution of cephalopod neural and morphological novelties. *Nature*.  
671 2015;doi:10.1038/nature14668.
- 672 [46] Kirkness EF. The Dog Genome: Survey Sequencing and Comparative Analysis. *Science*.  
673 2003;301(5641):1898–1903. doi:10.1126/science.1086432.
- 674 [47] Mikkelsen TS, Wakefield MJ, Aken B, Amemiya CT, Chang JL, Duke S, et al. Genome of the marsupial  
675 *Monodelphis domestica* reveals innovation in non-coding sequences. *Nature*. 2007;447(7141):167–77.  
676 doi:10.1038/nature05805.
- 677 [48] Warren WC, Hillier LW, Marshall Graves JA, Birney E, Ponting CP, Grützner F, et al. Genome  
678 analysis of the platypus reveals unique signatures of evolution. *Nature*. 2008;453(7192):175–183.  
679 doi:10.1038/nature06936.
- 680 [49] Hellsten U, Harland RM, Gilchrist MJ, Hendrix D, Jurka J, Kapitonov V, et al. The genome  
681 of the Western clawed frog *Xenopus tropicalis*. *Science (New York, NY)*. 2010;328(5978):633–6.  
682 doi:10.1126/science.1183670.
- 683 [50] Zhang G, Li C, Li Q, Li B, Larkin DM, Lee C, et al. Comparative genomics reveals insights into avian  
684 genome evolution and adaptation. *Science*. 2014;346(6215):1311–1320. doi:10.1126/science.1251385.
- 685 [51] Warren WC, Clayton DF, Ellegren H, Arnold AP, Hillier LW, Künstner A, et al. The genome of a  
686 songbird. *Nature*. 2010;464(7289):757–62. doi:10.1038/nature08819.
- 687 [52] Huang Y, Li Y, Burt DW, Chen H, Zhang Y, Qian W, et al. The duck genome and transcriptome  
688 provide insight into an avian influenza virus reservoir species. *Nature genetics*. 2013;45(7):776–83.  
689 doi:10.1038/ng.2657.
- 690 [53] Ganapathy G, Howard JT, Ward JM, Li J, Li B, Li Y, et al. High-coverage sequencing and annotated  
691 assemblies of the budgerigar genome. *GigaScience*. 2014;3:11. doi:10.1186/2047-217X-3-11.
- 692 [54] Green RE, Braun EL, Armstrong J, Earl D, Nguyen N, Hickey G, et al. Three crocodylian genomes  
693 reveal ancestral patterns of evolution among archosaurs. *Science*. 2014;346(6215):1254449–1254449.  
694 doi:10.1126/science.1254449.
- 695 [55] Alföldi J, Di Palma F, Grabherr M, Williams C, Kong L, Mauceli E, et al. The genome of the green  
696 anole lizard and a comparative analysis with birds and mammals. *Nature*. 2011;477(7366):587–91.  
697 doi:10.1038/nature10390.
- 698 [56] Shaffer HB, Minx P, Warren DE, Shedlock AM, Thomson RC, Valenzuela N, et al. The western  
699 painted turtle genome, a model for the evolution of extreme physiological adaptations in a slowly  
700 evolving lineage. *Genome biology*. 2013;14(3):R28. doi:10.1186/gb-2013-14-3-r28.
- 701 [57] Wang Z, Pascual-Anaya J, Zadissa A, Li W, Niimura Y, Huang Z, et al. The draft genomes of soft-shell  
702 turtle and green sea turtle yield insights into the development and evolution of the turtle-specific body  
703 plan. *Nature Genetics*. 2013;45(6):701–706. doi:10.1038/ng.2615.
- 704 [58] Koning APJD, Hall KT, Card DC, Drew R, Fujita MK, Ruggiero RP, et al. The Burmese python  
705 genome reveals the molecular basis for extreme adaptation in snakes. *Proceedings of the National*  
706 *Academy of Sciences*. 2013;110(51):20645–20650. doi:10.1073/pnas.1324475110.

- 707 [59] Howe K, Clark MD, Torroja CF, Torrance J, Berthelot C, Muffato M, et al. The zebrafish refer-  
708 ence genome sequence and its relationship to the human genome. *Nature*. 2013;496(7446):498–503.  
709 doi:10.1038/nature12111.
- 710 [60] Amemiya CT, Alföldi J, Lee AP, Fan S, Philippe H, MacCallum I, et al. The African coelacanth genome  
711 provides insights into tetrapod evolution. *Nature*. 2013;496(7445):311–316. doi:10.1038/nature12027.
- 712 [61] Smith JJ, Kuraku S, Holt C, Sauka-Spengler T, Jiang N, Campbell MS, et al. Sequencing of the sea  
713 lamprey (*Petromyzon marinus*) genome provides insights into vertebrate evolution. *Nature genetics*.  
714 2013;45(4):415–21, 421e1–2. doi:10.1038/ng.2568.
- 715 [62] Venkatesh B, Lee AP, Ravi V, Maurya AK, Lian MM, Swann JB, et al. Elephant shark genome provides  
716 unique insights into gnathostome evolution. *Nature*. 2014;505(7482):174–179. doi:10.1038/nature12826.
- 717 [63] Zhang GG, Fang X, Guo X, Li L, Luo R, Xu F, et al. The oyster genome reveals stress adaptation  
718 and complexity of shell formation. *Nature*. 2012;490(7418):49–54. doi:10.1038/nature11413.
- 719 [64] Keeling CI, Yuen MM, Liao NY, Roderick Docking T, Chan SK, Taylor Ga, et al. Draft genome of  
720 the mountain pine beetle, *Dendroctonus ponderosae* Hopkins, a major forest pest. *Genome biology*.  
721 2013;14(3):R27. doi:10.1186/gb-2013-14-3-r27.
- 722 [65] Richards S, Gibbs Ra, Weinstock GM, Brown SJ, Denell RE, Beeman RW, et al. The genome of the  
723 model beetle and pest *Tribolium castaneum*. *Nature*. 2008;452(7190):949–55. doi:10.1038/nature06784.
- 724 [66] Mita K, Kasahara M, Sasaki S, Nagayasu Y, Yamada T, Kanamori H, et al. The genome sequence of  
725 silkworm, *Bombyx mori*. *DNA research*. 2004;11:27–35.
- 726 [67] Nossa CW, Havlak P, Yue JX, Lv J, Vincent KY, Brockmann HJ, et al. Joint assembly and genetic  
727 mapping of the Atlantic horseshoe crab genome reveals ancient whole genome duplication. *GigaScience*.  
728 2014;3:9. doi:10.1186/2047-217X-3-9.
- 729 [68] The *C. elegans* Sequencing Consortium. Genome Sequence of the Nematode *C. elegans*: A Platform  
730 for Investigating Biology. *Science*. 1998;282(5396):2012–2018. doi:10.1126/science.282.5396.2012.
- 731 [69] Sodergren E, Weinstock GM, Davidson EH, Cameron RA, Gibbs RA, Angerer RC, et al. The genome  
732 of the sea urchin *Strongylocentrotus purpuratus*. *Science (New York, NY)*. 2006;314(5801):941–52.  
733 doi:10.1126/science.1133609.
- 734 [70] Colbourne JK, Pfrender ME, Gilbert D, Thomas WK, Tucker A, Oakley TH, et al. The  
735 ecoresponsive genome of *Daphnia pulex*. *Science (New York, NY)*. 2011;331(6017):555–61.  
736 doi:10.1126/science.1197761.
- 737 [71] Weinstock GM, Robinson GE, Gibbs Ra, Worley KC, Evans JD, Maleszka R, et al. Insights into  
738 social insects from the genome of the honeybee *Apis mellifera*. *Nature*. 2006;443(7114):931–949.  
739 doi:10.1038/nature05260.
- 740 [72] Gulia-Nuss M, Nuss AB, Meyer JM, Sonenshine DE, Roe RM, Waterhouse RM, et al. Genomic  
741 insights into the *Ixodes scapularis* tick vector of Lyme disease. *Nature Communications*. 2016;7(May  
742 2015):10507. doi:10.1038/ncomms10507.
- 743 [73] Chipman AD, Ferrier DEK, Brena C, Qu J, Hughes DST, Schröder R, et al. The First Myriapod  
744 Genome Sequence Reveals Conservative Arthropod Gene Content and Genome Organisation in the  
745 Centipede *Strigamia maritima*. *PLoS Biology*. 2014;12(11). doi:10.1371/journal.pbio.1002005.
- 746 [74] Stanke M, Diekhans M, Baertsch R, Haussler D. Using native and syntenically mapped  
747 cDNA alignments to improve de novo gene finding. *Bioinformatics*. 2008;24(5):637–644.  
748 doi:10.1093/bioinformatics/btn013.
- 749 [75] Hoff KJ, Stanke M. WebAUGUSTUS—a web service for training AUGUSTUS and predicting genes in  
750 eukaryotes. *Nucleic Acids Research*. 2013;41(W1):W123–W128. doi:10.1093/nar/gkt418.

- 751 [76] Chapman Ja, Kirkness EF, Simakov O, Hampson SE, Mitros T, Weinmaier T, et al. The dynamic  
752 genome of Hydra. *Nature*. 2010;464(7288):592–6. doi:10.1038/nature08830.
- 753 [77] Kim D, Pertea G, Trapnell C, Pimentel H, Kelley R, Salzberg SL. TopHat2: accurate alignment of tran-  
754 scriptomes in the presence of insertions, deletions and gene fusions. *Genome biology*. 2013;14(4):R36.  
755 doi:10.1186/gb-2013-14-4-r36.
- 756 [78] Pertea M, Pertea GM, Antonescu CM, Chang TC, Mendell JT, Salzberg SL. StringTie enables im-  
757 proved reconstruction of a transcriptome from RNA-seq reads. *Nature Biotechnology*. 2015;33(3).  
758 doi:10.1038/nbt.3122.
- 759 [79] Preußner C, Jaé N, Bindereif A. mRNA splicing in trypanosomes. *International Journal of Medical*  
760 *Microbiology*. 2012;302(4-5):221–224. doi:10.1016/j.ijmm.2012.07.004.
- 761 [80] Siegel TN, Hekstra DR, Wang X, Dewell S, Cross GAM. Genome-wide analysis of mRNA abundance  
762 in two life-cycle stages of *Trypanosoma brucei* and identification of splicing and polyadenylation sites.  
763 *Nucleic Acids Research*. 2010;38(15):4946–4957. doi:10.1093/nar/gkq237.
- 764 [81] Hardie DC, Hebert PD. Genome-size evolution in fishes. *Canadian Journal of Fisheries and Aquatic*  
765 *Sciences*. 2004;61(9):1636–1646. doi:10.1139/f04-106.
- 766 [82] Treangen TJ, Salzberg SL. Repetitive DNA and next-generation sequencing: Computational challenges  
767 and solutions. *Nature Reviews Genetics*. 2012;13(1):36–46. doi:10.1038/nrg3117.
- 768 [83] Kajitani R, Toshimoto K, Noguchi H, Toyoda A, Ogura Y, Okuno M, et al. Efficient de novo as-  
769 sembly of highly heterozygous genomes from whole-genome shotgun short reads. *Genome Research*.  
770 2014;24(8):1384–1395. doi:10.1101/gr.170720.113.
- 771 [84] Bankevich A, Nurk S, Antipov D, Gurevich Aa, Dvorkin M, Kulikov AS, et al. SPAdes: A New Genome  
772 Assembly Algorithm and Its Applications to Single-Cell Sequencing. *Journal of Computational Biology*.  
773 2012;19(5):455–477. doi:10.1089/cmb.2012.0021.
- 774 [85] Tilgner H, Nikolaou C, Althammer S, Sammeth M, Beato M, Valcárcel J, et al. Nucleosome positioning  
775 as a determinant of exon recognition. *Nature structural & molecular biology*. 2009;16(9):996–1001.  
776 doi:10.1038/nsmb.1658.
- 777 [86] Sakharkar MK, Chow VTK, Kanguane P. Distributions of exons and introns in the human genome.  
778 *In silico biology*. 2004;4(4):387–93.
- 779 [87] Bellis ES, Howe DK, Denver DR. Genome-wide polymorphism and signatures of selection in the  
780 symbiotic sea anemone *Aiptasia*. *BMC Genomics*. 2016;17:160. doi:10.1186/s12864-016-2488-6.
- 781 [88] Leffler EM, Bullaughey K, Matute DR, Meyer WK, S?gurel L, Venkat A, et al. Revisiting an  
782 Old Riddle: What Determines Genetic Diversity Levels within Species? *PLoS Biology*. 2012;10(9).  
783 doi:10.1371/journal.pbio.1001388.
- 784 [89] Bányai L, Patthy L. Putative extremely high rate of proteome innovation in lancelets might  
785 be explained by high rate of gene prediction errors. *Scientific Reports*. 2016;6(April):30700.  
786 doi:10.1038/srep30700.
- 787 [90] Zmasek CM, Godzik A. This Déjà Vu Feeling-Analysis of Multidomain Protein Evolution in Eukaryotic  
788 Genomes. *PLoS Computational Biology*. 2012;8(11). doi:10.1371/journal.pcbi.1002701.
- 789 [91] Hahn MW, Wray GA. The g-value paradox. *Evolution and Development*. 2002;4(2):73–75.  
790 doi:10.1046/j.1525-142X.2002.01069.x.
- 791 [92] Gregory TR. Synergy between sequence and size in large-scale genomics. *Nature reviews Genetics*.  
792 2005;6(9):699–708. doi:10.1038/nrg1674.

- 793 [93] Denton JF, Lugo-Martinez J, Tucker AE, Schrider DR, Warren WC, Hahn MW. Extensive Error in the  
794 Number of Genes Inferred from Draft Genome Assemblies. *PLoS Computational Biology*. 2014;10(12).  
795 doi:10.1371/journal.pcbi.1003998.
- 796 [94] Fernandez-Valverde SL, Degnan BM. Bilaterian-like promoters in the highly compact *Amphimedon*  
797 *queenslandica* genome. *Scientific Reports*. 2016;6(February):22496. doi:10.1038/srep22496.
- 798 [95] Wilson BA, Masel J. Putatively noncoding transcripts show extensive association with ribosomes.  
799 *Genome biology and evolution*. 2011;3:1245–52. doi:10.1093/gbe/evr099.
- 800 [96] Slavoff Sa, Mitchell AJ, Schwaid AG, Cabili MN, Ma J, Levin JZ, et al. Peptidomic discovery of  
801 short open reading frame-encoded peptides in human cells. *Nature chemical biology*. 2012;9(1):59–64.  
802 doi:10.1038/nchembio.1120.
- 803 [97] Guttman M, Russell P, Ingolia NT, Weissman JS, Lander ES. Ribosome profiling pro-  
804 vides evidence that large noncoding RNAs do not encode proteins. *Cell*. 2013;154(1):240–251.  
805 doi:10.1016/j.cell.2013.06.009.
- 806 [98] Petrov D. Mutational Equilibrium Model of Genome Size Evolution. *Theoretical Population Biology*.  
807 2002;61(4):531–544. doi:10.1006/tpbi.2002.1605.
- 808 [99] Moore G. The C-Value Paradox. *BioScience*. 1984;34(7):425–429. doi:10.2307/1309631.
- 809 [100] Thiébaud CH, Fischberg M. DNA content in the genus *Xenopus*. *Chromosoma*. 1977;59(3):253–7.
- 810 [101] Schad E, Tompa P, Hegyi H. The relationship between proteome size, structural disorder and organism  
811 complexity. *Genome biology*. 2011;12(12):R120. doi:10.1186/gb-2011-12-12-r120.
- 812 [102] Nilsen TW, Graveley BR. Expansion of the eukaryotic proteome by alternative splicing. *Nature*.  
813 2010;463(January). doi:10.1038/nature08909.
- 814 [103] Brett D, Pospisil H, Valcárcel J, Reich J, Bork P. Alternative splicing and genome complexity. *Nature*  
815 *genetics*. 2002;30(1):29–30. doi:10.1038/ng803.
- 816 [104] Kim H, Klein R, Majewski J, Ott J. Estimating rates of alternative splicing in mammals and inverte-  
817 brates. *Nature genetics*. 2004;36(9):915–6; author reply 916–7. doi:10.1038/ng0904-915.
- 818 [105] Chen L, Bush SJ, Tovar-Corona JM, Castillo-Morales A, Urrutia AO. Correcting for differential  
819 transcript coverage reveals a strong relationship between alternative splicing and organism complexity.  
820 *Molecular biology and evolution*. 2014;31(6):1402–13. doi:10.1093/molbev/msu083.
- 821 [106] Kim E, Magen A, Ast G. Different levels of alternative splicing among eukaryotes. *Nucleic Acids*  
822 *Research*. 2007;35(1):125–131. doi:10.1093/nar/gkl924.
- 823 [107] Pickrell JK, Pai AA, Gilad Y, Pritchard JK. Noisy splicing drives mRNA isoform diversity in human  
824 cells. *PLoS Genetics*. 2010;6(12):1–11. doi:10.1371/journal.pgen.1001236.
- 825 [108] Jeffery NW, Jardine CB, Gregory TR. A first exploration of genome size diversity in sponges. *Genome*.  
826 2013;56(8):451–6. doi:10.1139/gen-2012-0122.
- 827 [109] Gregory TR, Andrews CB, McGuire JA, Witt CC. The smallest avian genomes are found in  
828 hummingbirds. *Proceedings Biological sciences / The Royal Society*. 2009;276(1674):3753–3757.  
829 doi:10.1098/rspb.2009.1004.
